# Supplementary material
Source: publisher figshare collection journal article supplement (https://acs.figshare.com/ndownloader/files/4652179)

**C-C Bond Formation Catalyzed Heterogeneously by  
Nickel-on-Graphite (Ni/C<sub>g</sub>)**

**Bruce H. Lipshutz,\* Tom Butler, and Elizabeth Swift**

*Department of Chemistry and Biochemistry*

*University of California*

*Santa Barbara, California 93106 USA*

**Supporting Information**

**Standard Ni/C<sub>g</sub> catalyzed cross-couplings of boronic acids with aryl halides using conventional heating.** To a flame dried, argon purged 25 mL round bottom flask were added Ni/C<sub>g</sub> (96.0 mg, 0.08 mmol) and PPh<sub>3</sub> (63.0 mg, 0.24 mmol) under argon at rt. THF (2 mL) was then added followed by *n*-BuLi (63 µL, 2.55 M in hexanes, 0.16 mmol). The solution was allowed to stir at rt for 15 min. The aryl halide (1.00 mmol), boronic acid (2.00 mmol), KF (174 mg, 3.00 mmol), LiOH (120 mg, 5.00 mmol) and dioxane (2 mL) were then added to the reaction mixture. The flask was loaded into a preheated oil bath and warmed to reflux. The reaction was allowed to stir until TLC indicated complete disappearance of the starting material. After cooling to rt, the reaction mixture was filtered and extracted with Et<sub>2</sub>O (3 x 10 mL) and H<sub>2</sub>O (3 x 10 mL). The combined organics were washed with brine and dried over anhydrous MgSO<sub>4</sub>. The solvent was removed *in vacuo* and the crude product was purified by silica gel chromatography (3:1 hex/ EtOAc).

**4-Methoxybiphenyl** (Table 1, entry A). Using the standard procedure outlined above, the following amounts of reagents were used: Ni/C (98.0 mg, 0.08 mmol), PPh<sub>3</sub> (63.0 mg, 0.24 mmol), THF (2 mL), *n*-BuLi (63 µL, 2.55 M in hexanes, 0.16 mmol), 4-chloroanisole (0.127 mL, 1.00 mmol), phenylboronic acid (244 mg, 2.00 mmol), KF (174 mg, 3.00 mmol), LiOH (120 mg, 5.00 mmol) and dioxane (2 mL). The reaction was allowed to stir overnight at which point TLC indicated incomplete conversion of the starting material. After cooling to rt, the reaction mixture was filtered and extracted with Et<sub>2</sub>O (3 x 10 mL) and H<sub>2</sub>O (3 x 10 mL). The combined organics were washed with brine and dried over anhydrous MgSO<sub>4</sub>. The solvent was removed *in vacuo* and the crude product was purified by silica gel chromatography (3:1 hex/ EtOAc). After purification 74 mg of the title compound was isolated (40%). R<sub>f</sub> = 0.75 (3:1 hex/ EtOAc). Spectral data of the product matched that of previously reported spectra.<sup>1</sup>

**3,4',4-Trimethoxybiphenyl** (Table 1, entry B; using Ni/C). Using the standard procedure outlined above, the following amounts of reagents were used: Ni/C (98.0 mg, 0.08 mmol), PPh<sub>3</sub> (63.0 mg, 0.24 mmol), THF (2 mL), *n*-BuLi (63 µL, 2.55 M in hexanes, 0.16 mmol), 4-chloroanisole (0.127 mL, 1.00 mmol), 3,4-dimethoxyphenylboronic acid (244 mg, 2.00 mmol), KF (174 mg, 3.00 mmol), LiOH (120

mg, 5.00 mmol) and dioxane (2 mL). The reaction was allowed to stir for 14 h at which point TLC indicated complete disappearance of the starting material. After cooling to rt, the reaction mixture was filtered and extracted with Et<sub>2</sub>O (3 x 10 mL) and H<sub>2</sub>O (3 x 10 mL). The combined organics were washed with brine and dried over anhydrous MgSO<sub>4</sub>. The solvent was removed *in vacuo* and the crude product was purified by silica gel chromatography (3:1 hex/EtOAc). After purification 221 mg of the title compound was isolated (90%). R<sub>f</sub> = 0.33 (3:1 hex/EtOAc). Spectra matched entry B, Ni/C<sub>g</sub>.

**3,4',4-Trimethoxybiphenyl** (Table 1, entry B; using Ni/C<sub>g</sub>). Using the standard procedure outlined above, the following amounts of reagents were used: Ni/C<sub>g</sub> (96.0 mg, 0.08 mmol), PPh<sub>3</sub> (63.0 mg, 0.24 mmol), THF (2 mL), *n*-BuLi (63 µL, 2.55 M in hexanes, 0.16 mmol), 4-chloroanisole (0.127 mL, 1.00 mmol), 3,4-dimethoxyphenylboronic acid (244 mg, 2.00 mmol), KF (174 mg, 3.00 mmol), LiOH (120 mg, 5.00 mmol) and dioxane (2 mL). The reaction was allowed to stir for 10 h at which point TLC indicated complete disappearance of the starting material. After cooling to rt, the reaction mixture was filtered and extracted with Et<sub>2</sub>O (3 x 10 mL) and H<sub>2</sub>O (3 x 10 mL). The combined organics were washed with brine and dried over anhydrous MgSO<sub>4</sub>. The solvent was removed *in vacuo* and the crude product was purified by silica gel chromatography (3:1 hex/EtOAc). After purification 223 mg of the title compound was isolated (92%). R<sub>f</sub> = 0.33 (3:1 hex/EtOAc); <sup>1</sup>H NMR (CDCl<sub>3</sub>, 400 MHz) δ 7.35 (t, *J* = 7.9, 1H), 7.15 (m, 2H), 7.11 (m, 2H), 6.94 (d, *J* = 8.3, 1H), 6.87 (m, 1H), 3.95 (s, 3H), 3.93 (s, 1H), 3.87 (s, 1H); <sup>13</sup>C NMR (CDCl<sub>3</sub>, 100 MHz) δ 160.1, 149.2, 148.8, 142.8, 134.2, 129.9, 119.6, 113.0, 112.1, 111.5, 110.6, 56.1, 55.5; HREIMS *m/z* calcd for C<sub>15</sub>H<sub>16</sub>O<sub>3</sub> 244.1099; found 244.1097.

**2-Methoxybiphenyl** (Table 1, entry C; using Ni/C). Using the standard procedure outlined above, the following amounts of reagents were used: Ni/C (98.0 mg, 0.08 mmol), PPh<sub>3</sub> (63.0 mg, 0.240 mmol), THF (2 mL), *n*-BuLi (63 µL, 2.55 M in hexanes, 0.16 mmol), 2-chloroanisole (0.127 mL, 1.00 mmol), phenylboronic acid (244 mg, 2.00 mmol), KF (174 mg, 3.00 mmol), LiOH (120 mg, 5.00 mmol) and dioxane (2 mL). The reaction was allowed to stir overnight at which point TLC indicated no consumption of the starting material.<sup>1</sup>

**2-Methoxybiphenyl** (Table 1, entry C; using Ni/C<sub>g</sub> + conventional heating). Using the standard procedure outlined above, the following amounts of reagents were used: Ni/C<sub>g</sub> (96.0 mg, 0.08 mmol), PPh<sub>3</sub> (63.0 mg, 0.24 mmol), THF (2 mL), *n*-BuLi (63 µL, 2.55 M in hexanes, 0.16 mmol), 2-chloroanisole (0.127 mL, 1.00 mmol), phenylboronic acid (244 mg, 2.00 mmol), KF (174 mg, 3.00 mmol), LiOH (120 mg, 5.00 mmol) and dioxane (2 mL). The reaction was allowed to stir for 12 h at which point TLC indicated complete disappearance of the starting material. After cooling to rt, the reaction mixture was filtered and extracted with Et<sub>2</sub>O (3 x 10 mL) and H<sub>2</sub>O (3 x 10 mL). The combined organics were washed with brine and dried over anhydrous MgSO<sub>4</sub>. The solvent was removed *in vacuo* and the crude product was purified by silica gel chromatography (3:1 hex/EtOAc). After purification 164 mg of the title compound was isolated (89%). R<sub>f</sub> = 0.75 (3:1 hex/EtOAc). Spectral data of the product matched that of previously reported spectra.<sup>1</sup>

**Representative Procedure for the Microwave-Assisted Nickel-on-Graphite Catalyzed Suzuki Coupling. Ni/C<sub>g</sub> catalyzed cross-coupling of a boronic acid with an aryl halide; 2-methoxybiphenyl** (Table 1, entry C). To a flame dried, argon purged Emrys Optimizer 2-5 mL pyrex reaction vessel were added Ni/C<sub>g</sub> (96.0 mg, 0.08 mmol) and PPh<sub>3</sub> (63.0 mg, 0.24 mmol) under argon at rt. THF (2 mL) was then added followed by *n*-BuLi (63 µL, 2.55 M in hexanes, 0.16 mmol). The solution was allowed to stir at rt for 15 min. 2-Chloroanisole (0.127 mL, 1.00 mmol), phenylboronic acid (244 mg, 2.00 mmol), KF (174 mg, 3.00 mmol), LiOH (120 mg, 5.00 mmol) and dioxane (2 mL) were then added to the reaction mixture. The reaction vessel was placed in the Emrys Optimizer using the following specifications: Temperature: 200 °C, Time: 2700 sec., Fixed Hold Time: On, Sample Absorption: Normal, Pre-stirring: 45 sec. After cooling to rt, the reaction mixture was filtered and extracted with Et<sub>2</sub>O (3 x 10 mL) and H<sub>2</sub>O (3 x 10 mL). The combined organics were washed with brine and dried over anhydrous MgSO<sub>4</sub>. The solvent was removed *in vacuo* and the crude product was purified by silica gel chromatography (3:1 hex/EtOAc). After purification 161 mg of the title compound was isolated (87%). R<sub>f</sub> = 0.75 (3:1 hex/EtOAc).

**2,3',4'-Trimethoxybiphenyl** (Table 1, entry D). Using the standard procedure outlined above, the following amounts of reagents were used: Ni/C<sub>g</sub> (48.0 mg, 0.04 mmol), PPh<sub>3</sub> (31.5 mg, 0.120 mmol), THF (1 mL), *n*-BuLi (32 μL, 2.55 M in hexanes, 0.08 mmol), 2-chloroanisole (0.64 mL, 0.50 mmol), 3,4-dimethoxyphenylboronic acid (182 mg, 1.50 mmol), KF (87.0 mg, 1.50 mmol), LiOH (60.0 mg, 2.50 mmol), and dioxane (1.5 mL). Microwave conditions: Temperature: 200 °C, Time: 2700 sec., Fixed Hold Time: On, Sample Absorption: Normal, Pre-stirring: 45 sec. After purification 81 mg of the title compound was isolated (87%). R<sub>f</sub> = 0.33 (3:1 hex/EtOAc). Spectral data on the product matched that of previously reported spectra.<sup>1</sup>

**4-Methylbiphenyl** (Table 1, entry E). Using the standard conventional procedure outlined above, the following amounts of reagents were used: Ni/C<sub>g</sub> (96.0 mg, 0.08 mmol), PPh<sub>3</sub> (63.0 mg, 0.240 mmol), THF (2 mL), *n*-BuLi (63 μL, 2.55 M in hexanes, 0.16 mmol), 4-bromotoluene (171 mg, 1.00 mmol), phenylboronic acid (244 mg, 2.00 mmol), KF (174 mg, 3.00 mmol), LiOH (120 mg, 5.00 mmol) and dioxane (2 mL). The reaction was allowed to stir for 9 h at which point TLC indicated complete disappearance of the starting material. After cooling to rt, the reaction mixture was filtered and extracted with Et<sub>2</sub>O (3 x 10 mL) and H<sub>2</sub>O (3 x 10 mL). The combined organics were washed with brine and dried over anhydrous MgSO<sub>4</sub>. The solvent was removed *in vacuo* and the crude product was purified by silica gel chromatography (3:1 hex/EtOAc). After purification 146 mg of the title compound was isolated (87%). R<sub>f</sub> = 0.79 (3:1 hex/EtOAc). Spectral data of the product matched that of previously reported spectra.<sup>1</sup>

**3,4-Dimethoxy-4'-methylbiphenyl** (Table 1, entry F). Using the standard conventional procedure outlined above, the following amounts of reagents were used: Ni/C<sub>g</sub> (96.0 mg, 0.08 mmol), PPh<sub>3</sub> (63.0 mg, 0.240 mmol), THF (2 mL), *n*-BuLi (63 μL, 2.55 M in hexanes, 0.16 mmol), ), 4-bromotoluene (171 mg, 1.00 mmol), 3,4-dimethoxyphenylboronic acid (244 mg, 2.00 mmol), KF (174 mg, 3.00 mmol), LiOH (120 mg, 5.00 mmol) and dioxane (2 mL). The reaction was allowed to stir for 7 h at which point TLC indicated complete disappearance of the starting material. After cooling to rt, the reaction mixture

was filtered and extracted with Et<sub>2</sub>O (3 x 10 mL) and H<sub>2</sub>O (3 x 10 mL). The combined organics were washed with brine and dried over anhydrous MgSO<sub>4</sub>. The solvent was removed *in vacuo* and the crude product was purified by silica gel chromatography (3:1 hex/EtOAc). After purification 196 mg of the title compound was isolated (86%). R<sub>f</sub> = 0.35 (3:1 hex/EtOAc). <sup>1</sup>H NMR (CDCl<sub>3</sub>, 400 MHz) δ 7.49 (m, 2H), 7.25 (m, 2H), 7.20 (m, 1H), 7.13 (m, 2H), 6.90 (m, 1H), 3.97 (s, 3H), 3.92 (s, 3H), 2.40 (s, 3H); <sup>13</sup>C NMR (CDCl<sub>3</sub>, 100 MHz) δ 149.3, 148.8, 138.4, 136.7, 134.4, 129.6, 126.9, 119.3, 111.6, 110.4, 56.1, 21.2; HREIMS *m/z* calcd for C<sub>15</sub>H<sub>16</sub>O<sub>2</sub> 228.1150; found 228.1156.

**Standard Ni/C<sub>g</sub> catalyzed cross-couplings of boronic acids with aryl tosylates.** To an Emrys Optimizer 2-5 mL pyrex reaction vessel was added Ni/C<sub>g</sub> (96.0 mg, 0.08 mmol) and PPh<sub>3</sub> (63.0 mg, 0.240 mmol) under argon at rt. THF (2 mL) was added followed by *n*-BuLi (63 μL, 2.55 M in hexanes, 0.16 mmol). The solution was allowed to stir at rt for 15 min. The aryl tosylate (1.00 mmol), boronic acid (2.00 mmol), KF (174 mg, 3.00 mmol), LiOH (120 mg, 5.00 mmol) and dioxane (2 mL) were then added to the reaction mixture. The reaction vessel was placed in the Emrys Optimizer using the following specifications: Temperature: 180 °C, Time: 2700 sec., Fixed Hold Time: On, Sample Absorption: Normal, Pre-stirring: 45 sec. After cooling to rt, the reaction mixture was filtered and extracted with Et<sub>2</sub>O (3 x 10 mL) and H<sub>2</sub>O (3 x 10 mL). The combined organics were washed with brine and dried over anhydrous MgSO<sub>4</sub>. The solvent was removed *in vacuo* and the crude product was purified by silica gel chromatography (3:1 hex/EtOAc).

**1-Phenylnaphthalene** (Table 2, entry 1). Using the standard procedure outlined above, the following amounts of reagents were used: Ni/C<sub>g</sub> (48.0 mg, 0.04 mmol), PPh<sub>3</sub> (31.5 mg, 0.120 mmol), THF (2 mL), *n*-BuLi (32 μL, 2.55 M in hexanes, 0.08 mmol), 2-tosyloxynaphthalene (149 mg, 0.50 mmol), phenylboronic acid (122 mg, 1.00 mmol), KF (87.0 mg, 1.50 mmol), LiOH (60.0 mg, 2.50 mmol), and dioxane (1 mL). Microwave conditions: Temperature: 200 °C, Time: 7200 sec., Fixed Hold Time: On, Sample Absorption: Normal, Pre-stirring: 45 sec. GC-MS analysis indicated 100% conversion.<sup>1</sup>

**3,4-Dimethoxy-4'-phenylbiphenyl** (Table 2, entry 2). Using the standard procedure outlined above, the following amounts of reagents were used: Ni/C<sub>g</sub> (48.0 mg, 0.04 mmol), PPh<sub>3</sub> (31.5 mg, 0.120 mmol), THF (2 mL), *n*-BuLi (32 μL, 2.55 M in hexanes, 0.08 mmol), biphenyl-4-yl 4-methylbenzenesulfonate (162 mg, 0.50 mmol), 3,4-dimethoxyphenylboronic acid (182 mg, 1.00 mmol), KF (87.0 mg, 1.50 mmol), LiOH (60.0 mg, 2.50 mmol), and dioxane (1 mL). Microwave conditions: Temperature: 180 °C, Time: 16200 sec., Fixed Hold Time: On, Sample Absorption: Normal, Pre-stirring: 45 sec. After purification 118 mg of the title compound was isolated (81%). R<sub>f</sub> = 0.29 (3:1 hex/EtOAc). Spectral data on the product matched that of previously reported spectra.

**3,4-Dimethoxy-4'-phenylbiphenyl** (Table 2, entry 3). Using the standard procedure outlined above, the following amounts of reagents were used: Ni/C<sub>g</sub> (48.0 mg, 0.04 mmol), PPh<sub>3</sub> (31.5 mg, 0.120 mmol), THF (2 mL), *n*-BuLi (32 μL, 2.55 M in hexanes, 0.08 mmol), biphenyl-4-yl 4-methylbenzenesulfonate (162 mg, 0.50 mmol), 3,4-dimethoxyphenylboronic acid (182 mg, 1.00 mmol), KF (87.0 mg, 1.50 mmol), LiOH (60.0 mg, 2.50 mmol), and dioxane (1 mL). Microwave conditions: Temperature: 200 °C, Time: 5400 sec., Fixed Hold Time: On, Sample Absorption: Normal, Pre-stirring: 45 sec. After purification on silica gel (3:1 hex:EtOAc), 120 mg of the title compound was isolated (83%). R<sub>f</sub> = 0.29 (3:1 hex/EtOAc); <sup>1</sup>H NMR (CDCl<sub>3</sub>, 400 MHz) δ 7.65 (m, 6H), 7.47 (m, 2H), 7.20 (m, 1H), 7.16 (m, 1H), 6.99 (s, 1H), 6.96 (s, 1H), 3.98 (s, 3H), 3.94 (s, 3H); <sup>13</sup>C NMR (CDCl<sub>3</sub>, 100 MHz) δ 149.3, 148.8, 140.1, 139.9, 129.0, 127.6, 127.5, 127.4, 127.2, 119.5, 111.6, 110.4, 56.1; HREIMS *m/z* calcd for C<sub>20</sub>H<sub>18</sub>O<sub>2</sub> 290.1307; found 290.1301.

**3,4-Dimethoxy-4'-phenylbiphenyl** (using S-Phos). Using the standard procedure outlined above, the following amounts of reagents were used: Ni/C<sub>g</sub> (48.0 mg, 0.04 mmol), 2-dicyclohexylphosphino-2',6'-dimethoxybiphenyl (S-Phos, 15.7 mg, 0.04 mmol), THF (2 mL), *n*-BuLi (32 μL, 2.55 M in hexanes, 0.08 mmol), biphenyl-4-yl 4-methylbenzenesulfonate (162 mg, 0.50 mmol), 3,4-dimethoxyphenylboronic acid (182 mg, 1.00 mmol), KF (87.0 mg, 1.50 mmol), LiOH (60.0 mg, 2.50 mmol), and dioxane (1 mL). Microwave conditions: Temperature: 200 °C, Time: 5400 sec., Fixed Hold Time: On, Sample

Absorption: Normal, Pre-stirring: 45 sec. After purification 126 mg of the title compound was isolated (87%).  $R_f = 0.29$  (3:1 hex/EtOAc). Spectral data on the product matched that of previously reported spectra (listed above).

**1-(4'-Benzoylbiphenyl-3-yl)ethanone** (Table 2, entry 4). Using the standard procedure outlined above, the following amounts of reagents were used: Ni/C<sub>g</sub> (96.0 mg, 0.08 mmol), PPh<sub>3</sub> (63.0 mg, 0.24 mmol), THF (2 mL), *n*-BuLi (63  $\mu$ L, 2.55 M in hexanes, 0.16 mmol), 4-benzoylphenyl 4-methylbenzenesulfonate (352 mg, 1.00 mmol), 3-acetylphenylboronic acid (328 mg, 2.00 mmol), KF (174 mg, 3.00 mmol), LiOH (120 mg, 5.00 mmol), and dioxane (2 mL). Microwave conditions: Temperature: 180 °C, Time: 16200 sec., Fixed Hold Time: On, Sample Absorption: Normal, Pre-stirring: 45 sec. After purification 240 mg of the title compound was isolated (80%).  $R_f = 0.23$  (3:1 hex/EtOAc); <sup>1</sup>H NMR (CDCl<sub>3</sub>, 400 MHz)  $\delta$  8.25 (s, 1H), 8.01 (m, 1H), 7.93 (m, 2H), 7.85 (m, 3H), 7.75 (m, 2H), 7.61 (m, 2H), 7.52 (m, 2H), 2.69 (s, 3H); <sup>13</sup>C NMR (CDCl<sub>3</sub>, 100 MHz)  $\delta$  198.1, 196.4, 144.3, 140.7, 137.9, 137.7, 136.9, 132.7, 132.0, 131.0, 130.2, 129.5, 128.5, 128.3, 127.2, 27.0; HREIMS  $m/z$  calcd for C<sub>21</sub>H<sub>16</sub>O<sub>2</sub> 300.1150; found 300.1139.

**1-(4'-Methoxybiphenyl-2-yl)ethanone** (Table 2, entry 5). Using the standard procedure outlined above, the following amounts of reagents were used: Ni/C<sub>g</sub> (48.0 mg, 0.04 mmol), PPh<sub>3</sub> (31.5 mg, 0.120 mmol), THF (2 mL), *n*-BuLi (32  $\mu$ L, 2.55 M in hexanes, 0.08 mmol), 2-acetylphenyl-4-methylbenzenesulfonate (145 mg, 0.50 mmol), 4-methoxyphenylboronic acid (152 mg, 1.00 mmol), KF (87 mg, 1.50 mmol), LiOH (60 mg, 2.50 mmol), and dioxane (1 mL). Microwave conditions: Temperature: 200 °C, Time: 5400 sec., Fixed Hold Time: On, Sample Absorption: Normal, Pre-stirring: 45 sec. After purification 90 mg of the title compound was isolated (80%).  $R_f = 0.40$  (3:1 hex/EtOAc); <sup>1</sup>H NMR (CDCl<sub>3</sub>, 400 MHz)  $\delta$  7.51 (m, 2H), 7.386 (m, 2H), 7.26 (m, 2H), 6.98 (m, 2H), 3.86 (s, 3H), 2.02 (s, 3H); <sup>13</sup>C NMR (CDCl<sub>3</sub>, 100 MHz)  $\delta$  205.6, 159.7, 141.1, 140.3, 133.2, 130.9, 130.3, 130.2, 128.0, 127.2, 114.3, 55.5, 30.6; HREIMS  $m/z$  calcd for C<sub>15</sub>H<sub>14</sub>O<sub>2</sub> 226.0994; found 226.0998.



**1-(3'-(Trifluoromethyl)biphenyl-2-yl)ethanone** (Table 2, entry 6). Using the standard procedure outlined above, the following amounts of reagents were used: Ni/C<sub>g</sub> (48.0 mg, 0.04 mmol), PPh<sub>3</sub> (31.5 mg, 0.120 mmol), THF (2 mL), *n*-BuLi (32  $\mu$ L, 2.55 M in hexanes, 0.08 mmol), 2-acetylphenyl-4-methylbenzenesulfonate (145 mg, 0.50 mmol), 3-(trifluoromethyl)phenylboronic acid (190 mg, 1.00 mmol), KF (87 mg, 1.50 mmol), LiOH (60 mg, 2.50 mmol), and dioxane (1 mL). Microwave conditions: Temperature: 200 °C, Time: 5400 sec., Fixed Hold Time: On, Sample Absorption: Normal, Pre-stirring: 45 sec. After purification 120 mg of the title compound was isolated (91%). R<sub>f</sub> = 0.33 (3:1 hex/EtOAc); <sup>1</sup>H NMR (CDCl<sub>3</sub>, 400 MHz)  $\delta$  7.64 (m, 3H), 7.55 (m, 2H), 7.49 (m, 2H), 7.38 (m, 1H), 2.18 (s, 3H); <sup>13</sup>C NMR (CDCl<sub>3</sub>, 100 MHz)  $\delta$  203.7, 141.8, 139.3, 132.4, 131.3, 130.7, 129.2, 128.5, 128.3, 125.6, 124.7, 30.5; HREIMS *m/z* calcd for C<sub>15</sub>H<sub>11</sub>F<sub>3</sub>O 264.0762; found 264.0771.

**Negishi Carboalumination of a terminal alkyne using catalytic Cp<sub>2</sub>ZrCl<sub>2</sub> / catalytic IBAO / excess Me<sub>3</sub>Al followed by Ni/C<sub>g</sub> catalyzed cross-coupling with an aryl tosylate; (*E*)-4-(2-methyloct-1-enyl)biphenyl** (Scheme 3). To a flame dried argon purged 25 mL round bottomed (rb) flask was added bis(cyclopentadienyl)zirconium dichloride (14.6 mg, 0.05 mmol, 5.0 mol %), followed by the dropwise addition at 0 °C of Me<sub>3</sub>Al (2.0 M solution in toluene, 0.75 mL, 1.50 mmol, 1.5 equiv). While stirring at 0 °C, IBAO (0.28 mL, 0.100 mmol, 10 mol %) was then added. Lastly, octyne (0.150 mL, 1.00 mmol) was introduced and the homogeneous pale yellow solution stirred at rt for 2 h until TLC analysis (5% CH<sub>2</sub>Cl<sub>2</sub>/pet ether) indicated that the carboalumination was complete.

In a separate flame dried argon purged 10 mL microwave vial was combined triphenylphosphine (32 mg, 0.12 mmol) and Ni/C<sub>g</sub> (48 mg, 0.03 mmol, 0.03 equiv) in the glove box. THF (0.5 mL) was then added via syringe followed by the dropwise addition of *n*-BuLi (20.5  $\mu$ L, 0.06 mmol) to form the active Ni(0)/C<sub>g</sub> complex. After stirring at rt for 5 min, the vinylalane generated above was transferred to the vial via cannula. Lastly, 4-tosyloxybiphenyl (162.2 mg, 0.5 mmol) was added and the reaction vessel was placed in the Emrys Optimizer and exposed to microwave irradiation according to the following specifications: Temperature: 200 °C, Time: 3600 sec., Fixed Hold Time: On, Sample Absorption:

Normal, Pre-stirring: 45 sec. The reaction mixture was then extracted with water (3 x 10 mL) and Et<sub>2</sub>O (3 x 10 mL). The combined organics were washed with brine and dried over anhydrous MgSO<sub>4</sub>. The solvent was removed *in vacuo* and the crude product was purified by silica gel chromatography (3:1 hex/EtOAc) yielding 116 mg of compound **10** as a colorless oil (83%). The other regioisomer was not detected by GC. R<sub>f</sub> = 0.70 (3:1 hex/EtOAc); <sup>1</sup>H NMR (CDCl<sub>3</sub>, 400 MHz) δ 7.50 (m, 2H), 7.46 (m, 2H), 7.35 (m, 4H), 7.20 (s, 1H), 6.17 (m, 1H), 1.92 (m, 2H), 1.70 (s, 3H), 1.30 (m, 5H), 1.23 (m, 3H), 0.91 (m, 3H); <sup>13</sup>C NMR (CDCl<sub>3</sub>, 100 MHz) δ 137.3, 136.0, 134.2, 131.1, 129.8, 128.6, 127.5, 127.4, 123.6, 115.3, 33.2, 31.9, 29.5, 29.1, 22.8, 15.8, 14.3; HREIMS *m/z* calcd for C<sub>21</sub>H<sub>26</sub> 278.2034; found 278.2036.

**Standard Ni/C<sub>g</sub> catalyzed cross-couplings of vinylzirconocenes with aryl halides.** To a flame dried, argon purged 25 mL round bottom (rb) flask were added bis(cyclopentadienyl)zirconium chloride hydride (135 mg, 0.50 mmol) in the glove box, followed by THF (1.0 mL) via syringe. Octyne (0.075 mL, 0.50 mmol) was then added and the reaction was allowed to stir at rt until GC analysis indicated complete disappearance of the starting material. In a separate flame dried argon purged 10 mL microwave vial was combined triphenylphosphine (21 mg, 0.08 mmol) and Ni/C<sub>g</sub> (48 mg, 0.04 mmol) in the glove box. THF (0.5 mL) was then added via syringe followed by the dropwise addition of *n*-BuLi (30.75 μL, 0.08 mmol) to form the active Ni(0)/C<sub>g</sub> complex. After stirring at rt for 5 min, the vinylzirconocene generated above was transferred to the vial via cannula. Lastly, the aryl halide (0.50 mmol) was added and the reaction vessel was placed in the Emrys Optimizer and exposed to microwave irradiation according to the following specifications: Temperature: 200 °C, Time: 900 sec., Fixed Hold Time: On, Sample Absorption: Normal, Pre-stirring: 45 sec.

**(*E*)-1-(Oct-1-enyl)-3-(trifluoromethyl)benzene** (Table 3, entry 1). Using the standard procedure outlined above, the following amounts of reagents were used: zirconocene (135 mg, 0.50 mmol), octyne (0.075 mL, 0.5 mmol), Ni/C<sub>g</sub> (48 mg, 0.04 mmol, 0.1 equiv), *n*-BuLi (30.75 μL, 0.08 mmol, 0.2 equiv), and 1-iodo-3-(trifluoromethyl)benzene (0.072 mL, 0.50 mmol). The hydrozirconation was allowed to proceed for 45 min and the reaction vessel was then placed in the Emrys Optimizer using the following

specifications: Temperature: 200 °C, Time: 600 sec., Fixed Hold Time: On, Sample Absorption: Normal, Pre-stirring: 45 sec. The reaction mixture was then extracted with water (3 x 10 mL) and Et<sub>2</sub>O (3 x 10 mL). The combined organics were washed with brine and dried over anhydrous MgSO<sub>4</sub>. The solvent was removed *in vacuo* and the crude product was purified by silica gel chromatography (hexanes) affording 110 mg of the title compound as a colorless oil (85%). R<sub>f</sub> = 0.60 (hexanes). <sup>1</sup>H NMR (CDCl<sub>3</sub>, 400 MHz) δ 7.60 (s, 1H), 7.51 (m, 1H), 7.41 (m, 1H), 7.29 (m, 1H), 6.40 (m, 1H), 6.25 (m, 1H), 2.21 (q, *J*=6.0 Hz, 2H), 1.43 (m, 2H), 1.30 (m, 6H), 0.91 (m, 3H); <sup>13</sup>C NMR (CDCl<sub>3</sub>, 100 MHz) δ 141.1, 138.8, 133.5, 129.2, 129.0, 128.6, 123.9, 122.7, 33.2, 31.9, 31.8, 29.3, 29.1, 22.9, 14.3; HREIMS *m/z* calcd for C<sub>15</sub>H<sub>19</sub>F<sub>3</sub> 256.1439; found 256.1442.

**(*E*)-1-Fluoro-4-(oct-1-enyl)benzene** (Table 3, entry 2). Using the standard procedure outlined above, the following amounts of reagents were used: zirconocene (135 mg, 0.50 mmol), octyne (0.075 mL, 0.5 mmol), Ni/C<sub>g</sub> (48 mg, 0.040 mmol, 0.1 equiv), PPh<sub>3</sub> (21 mg, 0.08 mmol, 0.2 equiv), *n*-BuLi (30.75 μL, 0.08 mmol, 0.2 equiv), and 1-bromo-4-fluorobenzene (0.044 mL, 0.40 mmol). The hydrozirconation was allowed to proceed for 45 min and the reaction was then subjected to microwave irradiation according to the following specifications: Temperature: 200 °C, Time: 900 sec., Fixed Hold Time: On, Sample Absorption: Normal, Pre-stirring: 45 sec. The reaction mixture was then extracted with water (3 x 10 mL) and Et<sub>2</sub>O (3 x 10 mL). The combined organics were washed with brine and dried over anhydrous MgSO<sub>4</sub>. The solvent was removed *in vacuo* and the crude product was purified by silica gel chromatography (3:1 hex/EtOAc), isolating 171 mg of the title compound as a colorless oil (83%). R<sub>f</sub> = 0.67 (3:1 hex/EtOAc); <sup>1</sup>H NMR (CDCl<sub>3</sub>, 400 MHz) δ 7.35 (m, 2H), 6.95 (m, 2H), 6.38 (m, 1H), 6.17 (m, 1H), 2.18 (q, *J* = 6.1 Hz, 2H), 1.23 (m, 8H), 0.91 (m, 3H); <sup>13</sup>C NMR (CDCl<sub>3</sub>, 100 MHz) δ 163.2, 134.2, 131.1, 128.6, 127.5, 127.4, 115.5, 115.3, 33.2, 31.9, 29.5, 29.1, 22.8, 14.3; HREIMS *m/z* calcd for C<sub>14</sub>H<sub>19</sub>F 206.1471; found 206.1475.

**(E)-1-(Oct-1-enyl)-3-(trifluoromethyl)benzene** (Table 3, entry 3). Using the standard procedure outlined above, the following amounts of reagents were used: zirconocene (135 mg, 0.50 mmol), octyne (0.075 mL, 0.5 mmol), Ni/C<sub>g</sub> (48 mg, 0.04 mmol, 0.1 equiv), *n*-BuLi (30.75  $\mu$ L, 0.08 mmol, 0.2 equiv), and 1-chloro-3-(trifluoromethyl)benzene (0.068 mL, 0.50 mmol). The hydrozirconation was allowed to proceed for 45 min and the reaction vessel was then placed in the Emrys Optimizer using the following specifications: Temperature: 200 °C, Time: 600 sec., Fixed Hold Time: On, Sample Absorption: Normal, Pre-stirring: 45 sec. The reaction mixture was then extracted with water (3 x 10 mL) and Et<sub>2</sub>O (3 x 10 mL). The combined organics were washed with brine and dried over anhydrous MgSO<sub>4</sub>. The solvent was removed *in vacuo* and the crude product was purified by silica gel chromatography (hexanes), affording 115 mg of the title compound as a colorless oil (90%). R<sub>f</sub> = 0.60 (hexanes). <sup>1</sup>H NMR (CDCl<sub>3</sub>, 400 MHz)  $\delta$  7.58 (m, 1H), 7.51 (m, 1H), 7.41 (m, 2H), 6.40 (m, 1H), 6.35 (m, 1H), 2.21 (m, 2H), 1.47 (m, 2H), 1.30 (m, 8H), 0.89 (m, 3H); <sup>13</sup>C NMR (CDCl<sub>3</sub>, 100 MHz)  $\delta$  138.8, 133.5, 129.2, 129.0, 128.6, 122.7, 33.2, 31.9, 31.8, 29.3, 29.1, 22.8, 14.3; HREIMS *m/z* calcd for C<sub>15</sub>H<sub>19</sub>F<sub>3</sub> 256.1439; found 256.1442.

<sup>1</sup>. Riggleman, S.; Deshong, P.; *J. Org. Chem.* **2003**, 68, 8106.



TOPSPIN20.13C-CDCl3-000

Pulse sequence: zgpg30

Solvent: cdcl3

Acquisition temperature

INSTRUMENT: spect

Relax. delay: 4.000 sec

Pulse width: 12.000 sec

Acq. time: 9.140 sec

Width: 33441.7 Hz

Frequency: 125.761 MHz

Observed: 125.761 MHz

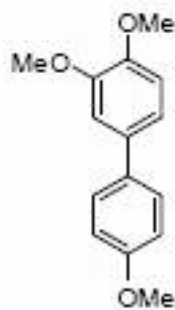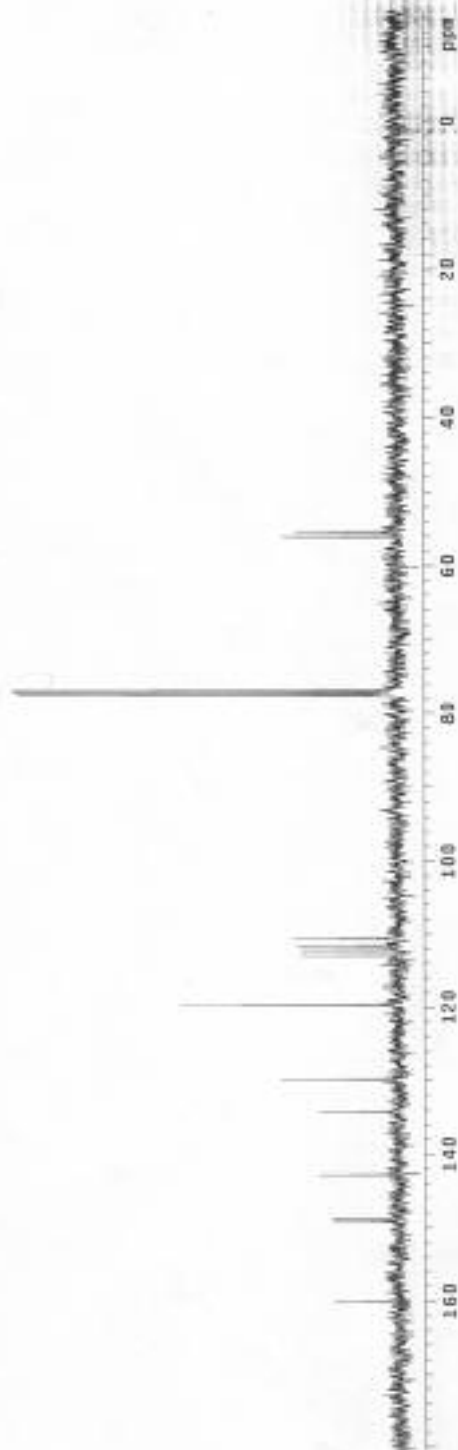

STANDARD 1H OBSERVE

Pulse Sequence: s2pul  
Solvent: cdc13  
Ambient temperature  
INOVA-400 "hmr400"

Relax. delay 1.000 sec  
Pulse 67.5 degrees  
Acq. time 3.734 sec  
Width 5431.4 Hz

Single scan 399.9486712 MHz  
OBSERVED  
DATA PROCESSING  
Line broadening 0.1 Hz  
F1 size 1556  
Total time 0 min, 4 sec

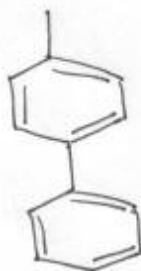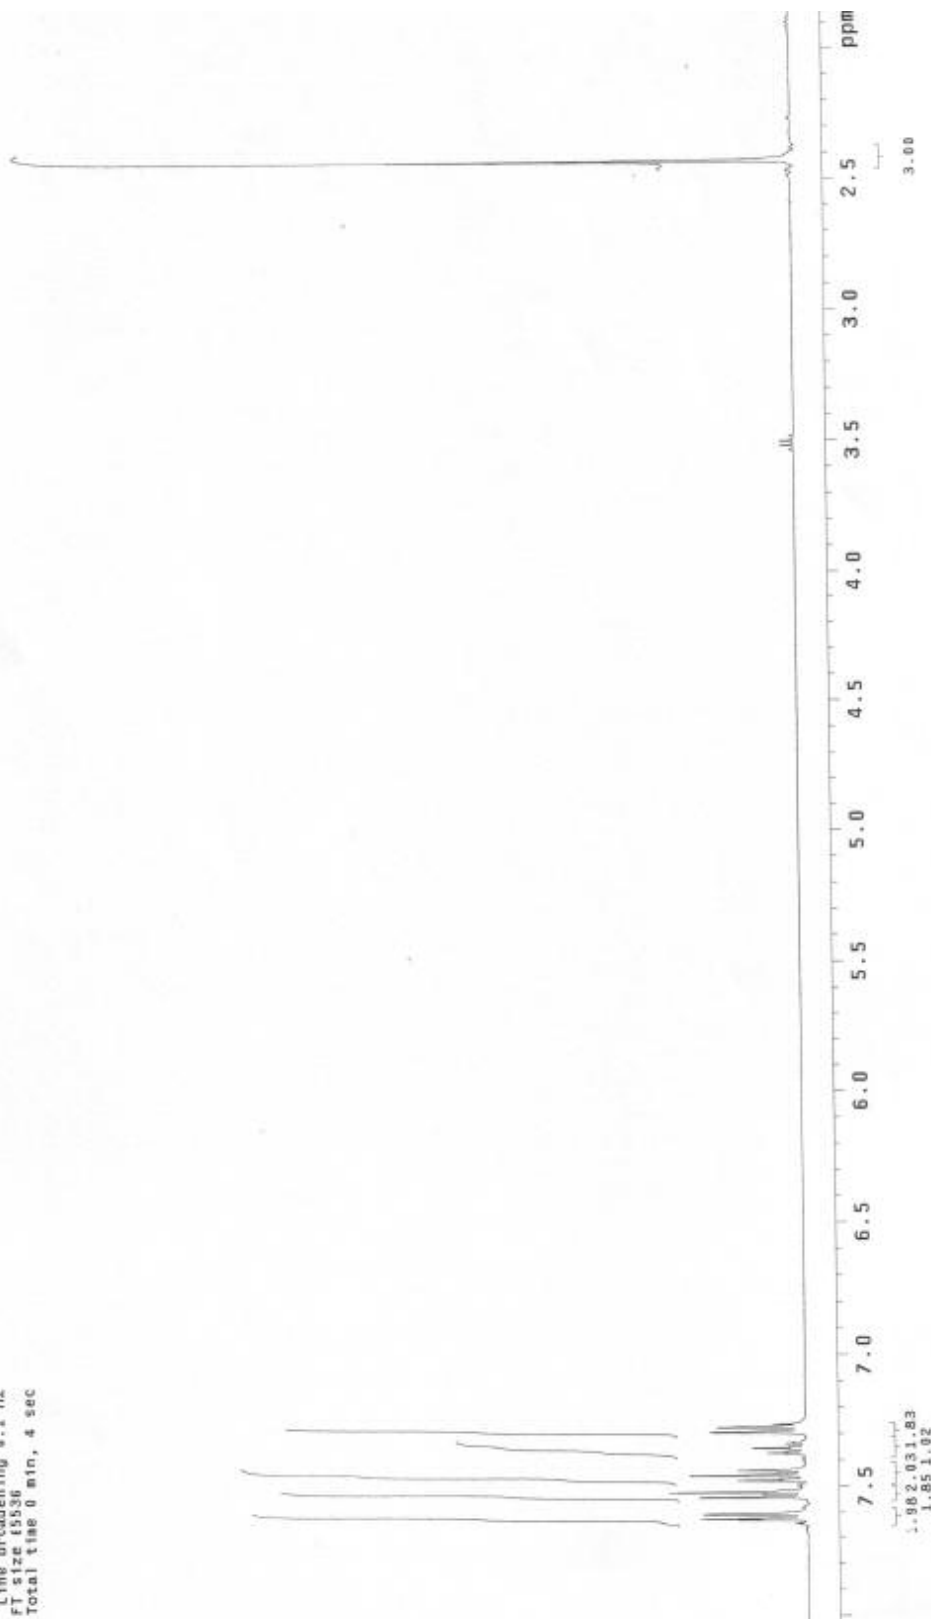

STANDARD 1H OBSERVE

Pulse Sequence: s2pu1  
Solvent: cdcl3  
Ambient temperature  
INOVA-400 "har400"

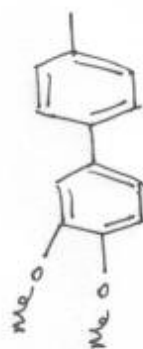

Relax. delay 1.000 sec  
Pulse 47.5 degrees  
Acq. time 3.744 sec  
Width 5631.4 Hz  
OBSERVE scan 399.9486712 MHz  
ONLINE PROCESSING  
Offline processing 0.1 Hz  
FT size 65536  
Total time 8 min, 4 sec

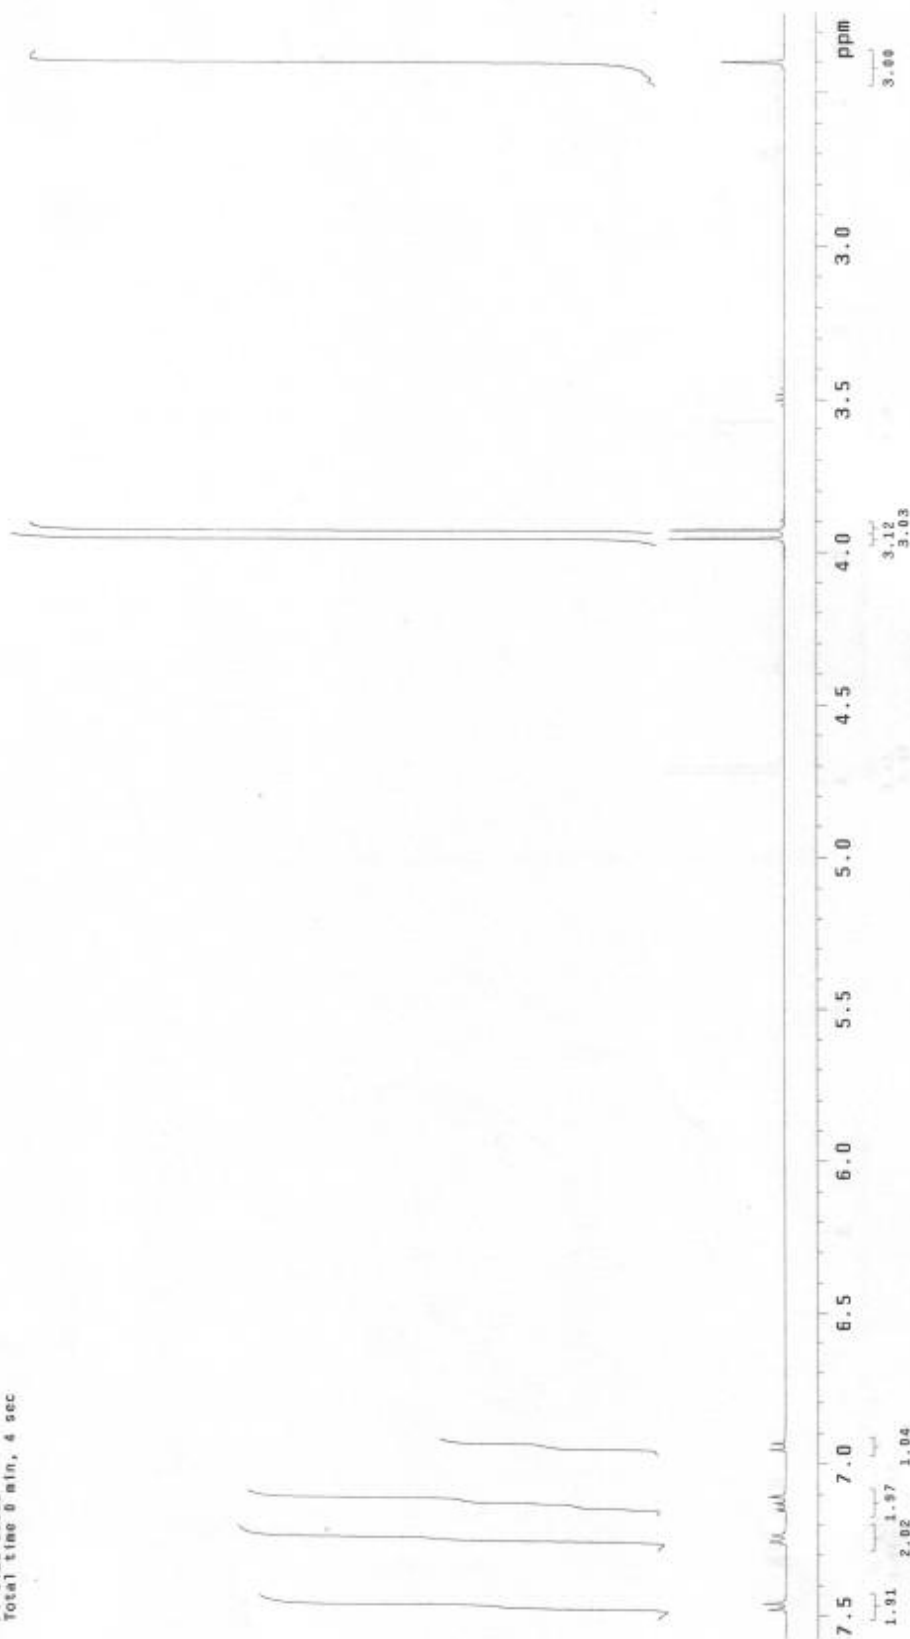



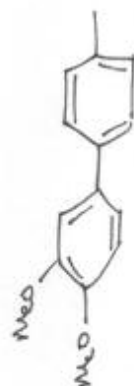

bp05992d.13c.cdcl3.qnp

Pulse Sequence: zgpg30

Solvent: cdcl3

Ambient temperature

INOVA-400 "nmr400"

Relax. delay 4.000 sec

Pulse 99.20 degrees

Acq. time 0.140 sec

Width 33641.7 Hz

55 repetitions

OBSERVE C13, 100.6271566 MHz

DECOUPLE H1, 399.9435797 MHz

Power 42 dB

on during acquisition

off during delay

VALT2-16 modulated

DATA PROCESSING

Line broadening 3.0 Hz

FT size 65536

Total time 860 hr, 53 min, 51 sec

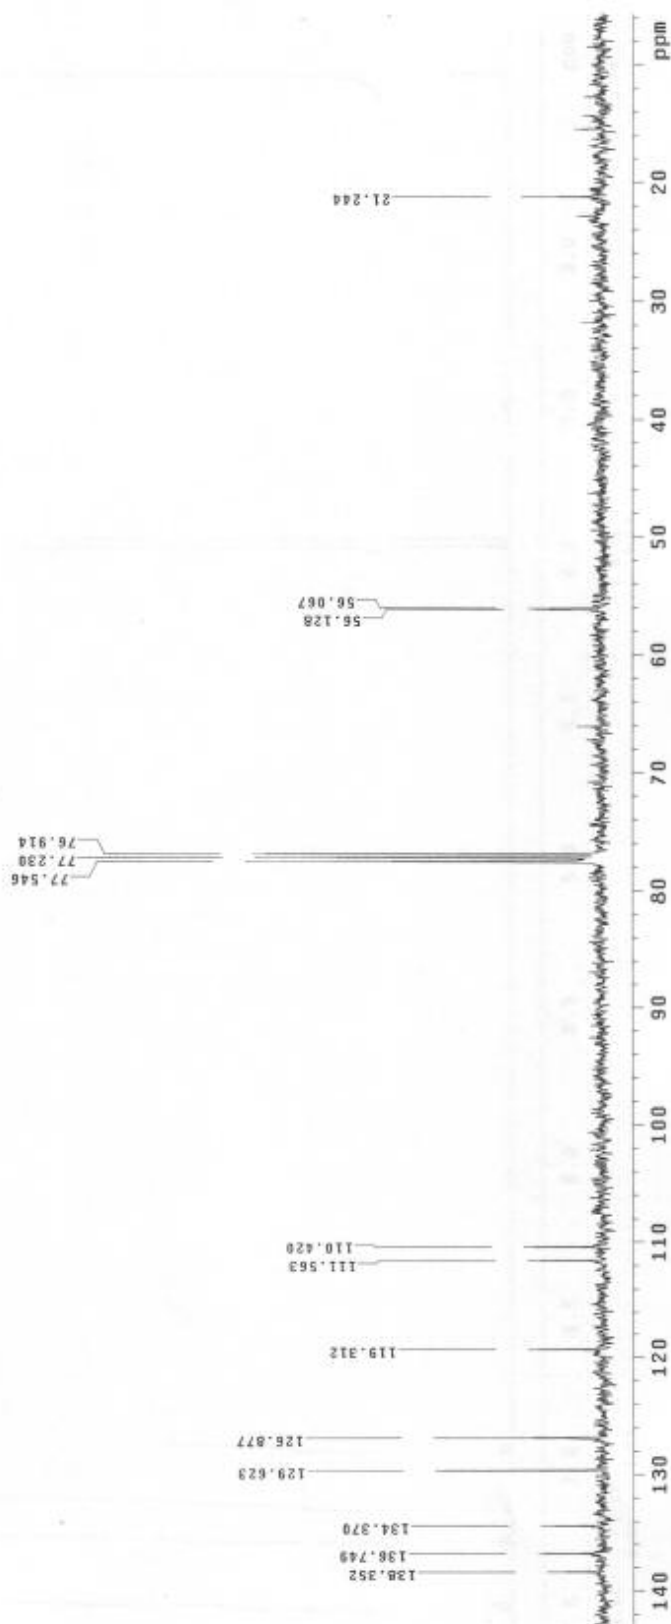

STANDARD IN OBSERVE

Pulse Sequence: zgpg30  
Solvent: cdcl3  
Ambient temperature  
INNOVA-400 400 MHz

Relax. delay 1.000 sec  
Pulse 67.5 degrees  
Acq. time 3.744 sec  
Width 503.4 Hz

Single scan  
OBSERVE M1 399.9486712 MHz  
DATA PROCESSING  
Line broadening 0.1 Hz  
FT size 65536  
Total time 0 min, 4 sec

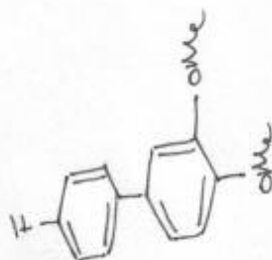

3

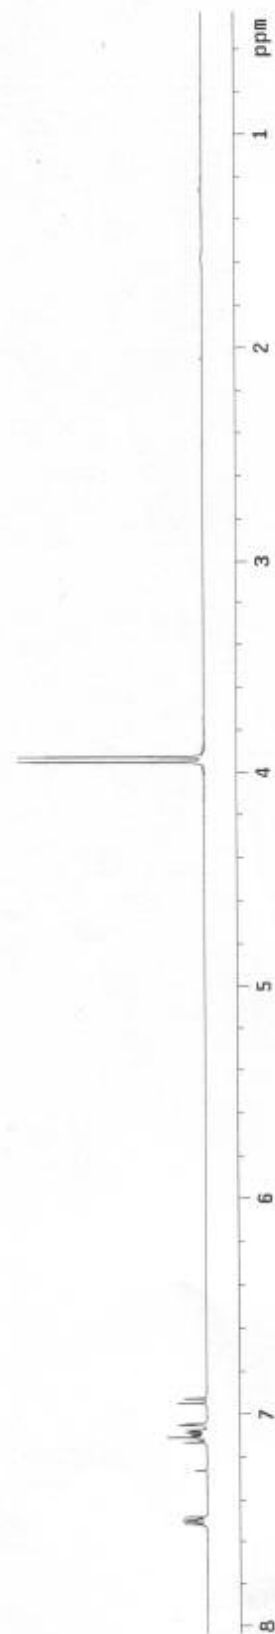

tbp050922d-13c.cdcl3.qnp

Pulse Sequence: s2pul

Solvent: cdcl3

Acq. time 0.540 sec

Width 33641.7 Hz

176 repetitions

OBSERVE C13, 100.5671566 MHz

DECOUPLE H1, 399.8435797 MHz

Power 42 dB

on during acquisition

off during delay

WALTZ-16 modulated

DATA PROCESSING

Line broadening 3.0 Hz

FT size 65536

Total time 360 hr, 53 min, 56 sec

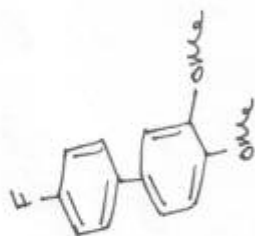

3

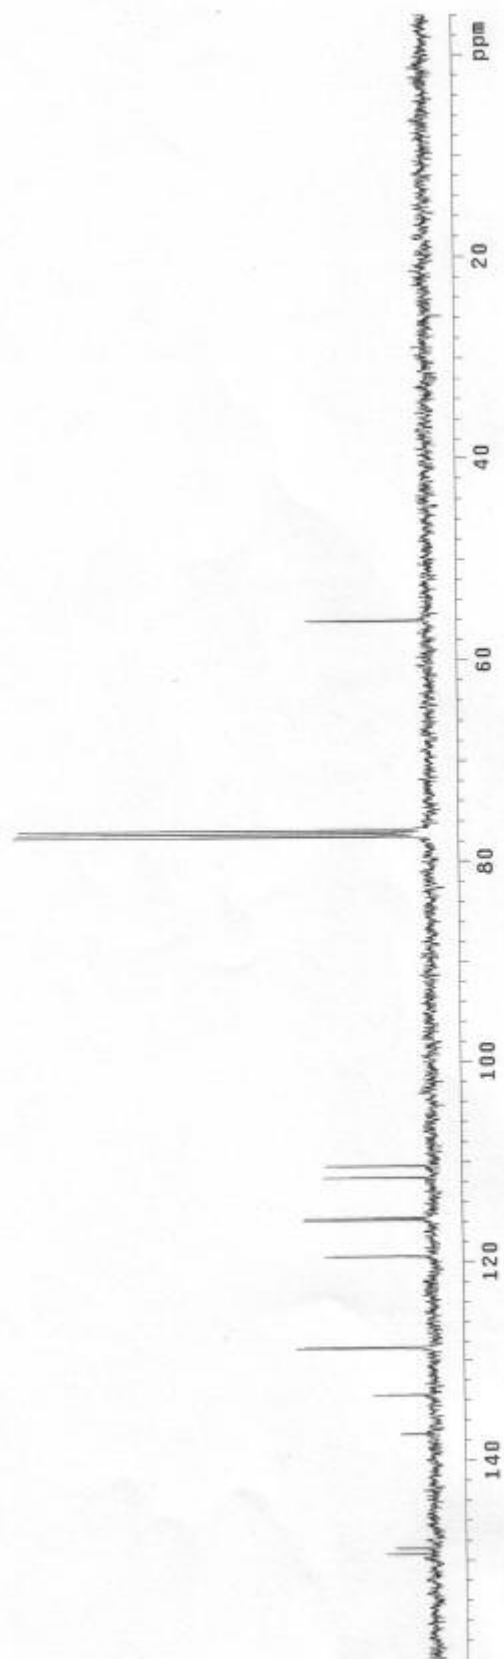

STANDARD 1H OBSERVE

Pulse Sequence: s2pul  
Solvent: cdcl3  
Ambient temperature  
INOVA-400 "mr400"

Relax. delay 1.000 sec  
Pulse 67.5 degrees  
Acq. time 3.744 sec  
Width 5031.4 Hz

SINGLE scan  
OBSERVE M1 399.9486712 MHz  
DATA PROCESSING  
Line broadening 0.1 Hz  
FT size 65536  
Total time 0 min, 4 sec

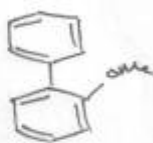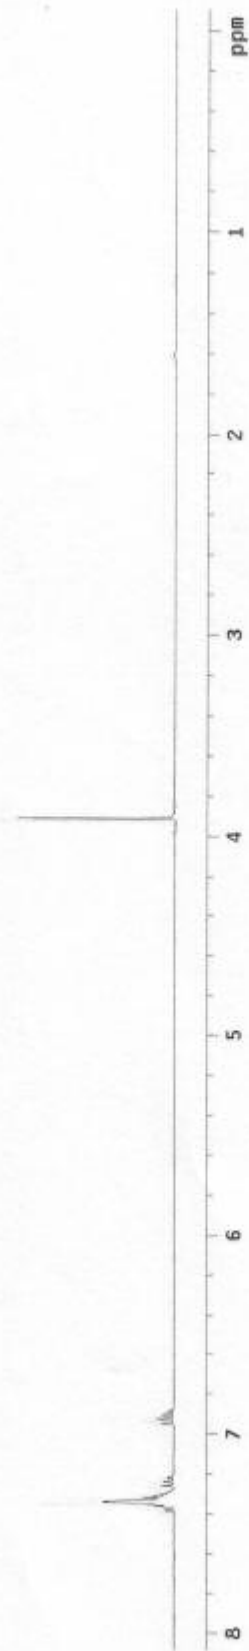

tbp050922d.13c.cd13.qnp

Pulse Sequence: s2pul1

Solvent: cdcl3

Ambient temperature

INOVA-400 "nmr400"

Relax. delay 4.000 sec

Pulse 99.2 degrees

Acq. time 0.640 sec

Width 33641.7 Hz

52 repetitions

OBSERVE C13, 100.5671566 MHz

DECOUPLE H1, 399.5495737 MHz

Power 42 dB

on during acquisition

off during delay

WALTZ-16 modulated

DATA PROCESSING

Line broadening 3.0 Hz

FT size 65536

Total time 860 hr, 53 min, 56 sec

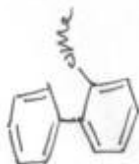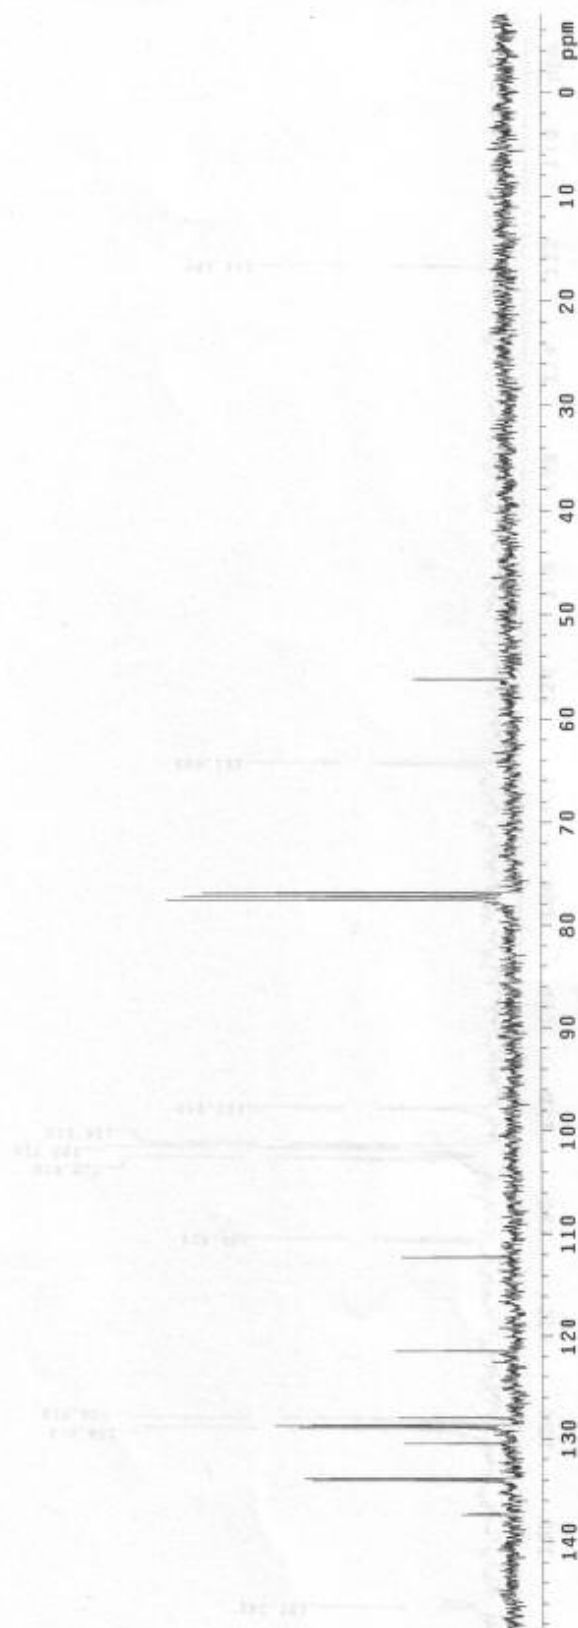

STANDARD 1H OBSERVE

Pulse Sequence: zgpg30  
 Solvent: cdcl3  
 Ambient temperature  
 File: 105V  
 INOVA-400 "nmr400"

Relax. delay 1.000 sec  
 Pulse 97.5 degrees  
 Acq. time 3.744 sec  
 Width 5931.3 Hz  
 32 repetitions

OBSERVE H3 399.9488882 MHz  
 DATA PROCESSING  
 Line broadening 0.1 Hz  
 FI size 35536  
 Total time 2 min, 32 sec

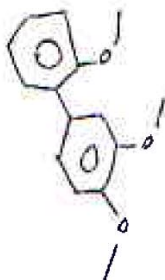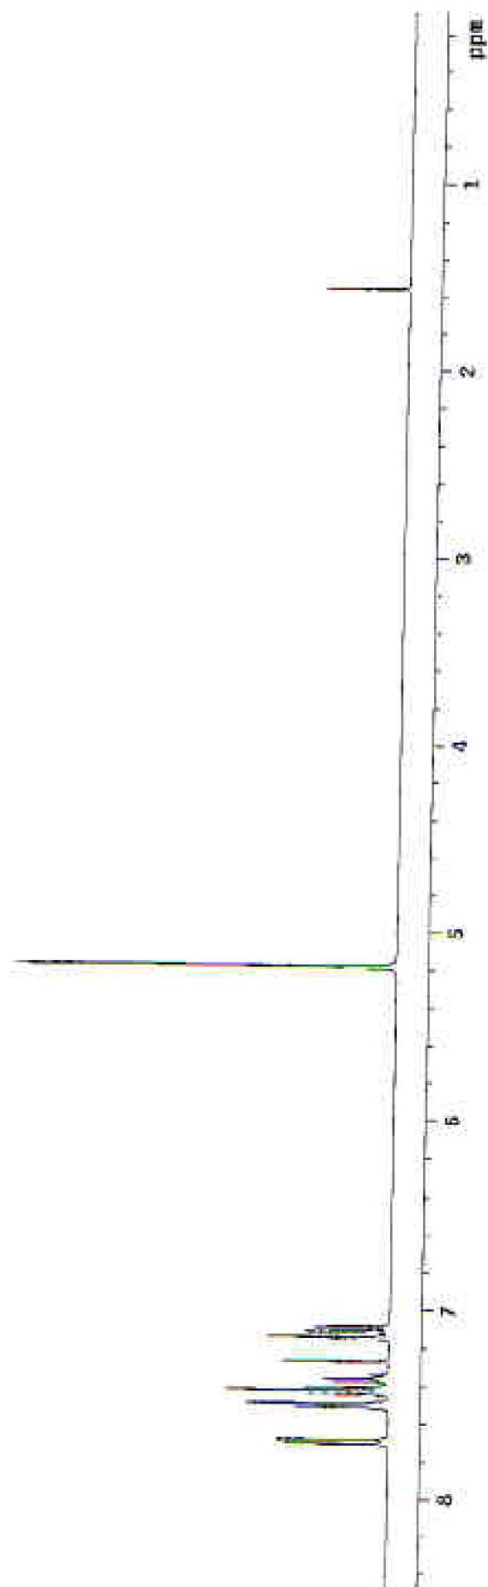

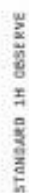

Pulse Sequence: 120w1

Solvent:  $\text{CHCl}_3$ 

Ambient temperature

INOVA-400™ 400R400™

1  
2  
3  
4  
5  
6  
7  
8  
9  
10  
11  
12  
13  
14  
15  
16  
17  
18  
19  
20  
21  
22  
23  
24  
25  
26  
27  
28  
29  
30  
31  
32  
33  
34  
35  
36  
37  
38  
39  
40  
41  
42  
43  
44  
45  
46  
47  
48  
49  
50  
51  
52  
53  
54  
55  
56  
57  
58  
59  
60  
61  
62  
63  
64  
65  
66  
67  
68  
69  
70  
71  
72  
73  
74  
75  
76  
77  
78  
79  
80  
81  
82  
83  
84  
85  
86  
87  
88  
89  
90  
91  
92  
93  
94  
95  
96  
97  
98  
99  
100  
101  
102  
103  
104  
105  
106  
107  
108  
109  
110  
111  
112  
113  
114  
115  
116  
117  
118  
119  
120  
121  
122  
123  
124  
125  
126  
127  
128  
129  
130  
131  
132  
133  
134  
135  
136  
137  
138  
139  
140  
141  
142  
143  
144  
145  
146  
147  
148  
149  
150  
151  
152  
153  
154  
155  
156  
157  
158  
159  
160  
161  
162  
163  
164  
165  
166  
167  
168  
169  
170  
171  
172  
173  
174  
175  
176  
177  
178  
179  
180  
181  
182  
183  
184  
185  
186  
187  
188  
189  
190  
191  
192  
193  
194  
195  
196  
197  
198  
199  
200  
201  
202  
203  
204  
205  
206  
207  
208  
209  
210  
211  
212  
213  
214  
215  
216  
217  
218  
219  
220  
221  
222  
223  
224  
225  
226  
227  
228  
229  
230  
231  
232  
233  
234  
235  
236  
237  
238  
239  
240  
241  
242  
243  
244  
245  
246  
247  
248  
249  
250  
251  
252  
253  
254  
255  
256  
257  
258  
259  
260  
261  
262  
263  
264  
265  
266  
267  
268  
269  
270  
271  
272  
273  
274  
275  
276  
277  
278  
279  
280  
281  
282  
283  
284  
285  
286  
287  
288  
289  
290  
291  
292  
293  
294  
295  
296  
297  
298  
299  
300  
301  
302  
303  
304  
305  
306  
307  
308  
309  
310  
311  
312  
313  
314  
315  
316  
317  
318  
319  
320  
321  
322  
323  
324  
325  
326  
327  
328  
329  
330  
331  
332  
333  
334  
335  
336  
337  
338  
339  
340  
341  
342  
343  
344  
345  
346  
347  
348  
349  
350  
351  
352  
353  
354  
355  
356  
357  
358  
359  
360  
361  
362  
363  
364  
365  
366  
367  
368  
369  
370  
371  
372  
373  
374  
375  
376  
377  
378  
379  
380  
381  
382  
383  
384  
385  
386  
387  
388  
389  
390  
391  
392  
393  
394  
395  
396  
397  
398  
399  
400  
401  
402  
403  
404  
405  
406  
407  
408  
409  
410  
411  
412  
413  
414  
415  
416  
417  
418  
419  
420  
421  
422  
423  
424  
425  
426  
427  
428  
429  
430  
431  
432  
433  
434  
435  
436  
437  
438  
439  
440  
441  
442  
443  
444  
445  
446  
447  
448  
449  
450  
451  
452  
453  
454  
455  
456  
457  
458  
459  
460  
461  
462  
463  
464  
465  
466  
467  
468  
469  
470  
471  
472  
473  
474  
475  
476  
477  
478  
479  
480  
481  
482  
483  
484  
485  
486  
487  
488  
489  
490  
491  
492  
493  
494  
495  
496  
497  
498  
499  
500  
501  
502  
503  
504  
505  
506  
507  
508  
509  
510  
511  
512  
513  
514  
515  
516  
517  
518  
519  
520  
521  
522  
523  
524  
525  
526  
527  
528  
529  
530  
531  
532  
533  
534  
535  
536  
537  
538  
539  
540  
541  
542  
543  
544  
545  
546  
547  
548  
549  
550  
551  
552  
553  
554  
555  
556  
557  
558  
559  
560  
561  
562  
563  
564  
565  
566  
567  
568  
569  
570  
571  
572  
573  
574  
575  
576  
577  
578  
579  
580  
581  
582  
583  
584  
585  
586  
587  
588  
589  
590  
591  
592  
593  
594  
595  
596  
597  
598  
599  
600  
601  
602  
603  
604  
605  
606  
607  
608  
609  
610  
611  
612  
613  
614  
615  
616  
617  
618  
619  
620  
621  
622  
623  
624  
625  
626  
627  
628  
629  
630  
631  
632  
633  
634  
635  
636  
637  
638  
639  
640  
641  
642  
643  
644  
645  
646  
647  
648  
649  
650  
651  
652  
653  
654  
655  
656  
657  
658  
659  
660  
661  
662  
663  
664  
665  
666  
667  
668  
669  
670  
671  
672  
673  
674  
675  
676  
677  
678  
679  
680  
681  
682  
683  
684  
685  
686  
687  
688  
689  
690  
691  
692  
693  
694  
695  
696  
697  
698  
699  
700  
701  
702  
703  
704  
705  
706  
707  
708  
709  
710  
711  
712  
713  
714  
715  
716  
717  
718  
719  
720  
721  
722  
723  
724  
725  
726  
727  
728  
729  
730  
731  
732  
733  
734  
735  
736  
737  
738  
739  
740  
741  
742  
743  
744  
745  
746  
747  
748  
749  
750  
751  
752  
753  
754  
755  
756  
757  
758  
759  
760  
761  
762  
763  
764  
765  
766  
767  
768  
769  
770  
771  
772  
773  
774  
775  
776  
777  
778  
779  
780  
781  
782  
783  
784  
785  
786  
787  
788  
789  
790  
791  
792  
793  
794  
795  
796  
797  
798  
799  
800  
801  
802  
803  
804  
805  
806  
807  
808  
809  
810  
811  
812  
813  
814  
815  
816  
817  
818  
819  
820  
821  
822  
823  
824  
825  
826  
827  
828  
829  
830  
831  
832  
833  
834  
835  
836  
837  
838  
839  
840  
84

Relax. delay 1.000 sec  
Pulse 67.5 degrees

Pulse 67.5 degrees  
Acq. time 3.744 sec

Width 5031.4 Hz

Single scan  
needed HT  
see page 21

RESERVE HI, 959.948671  
DATA PROCESSING

Line broadening 0.1 Hz

FT 0120 65536

Total time 0 min, 4 sec

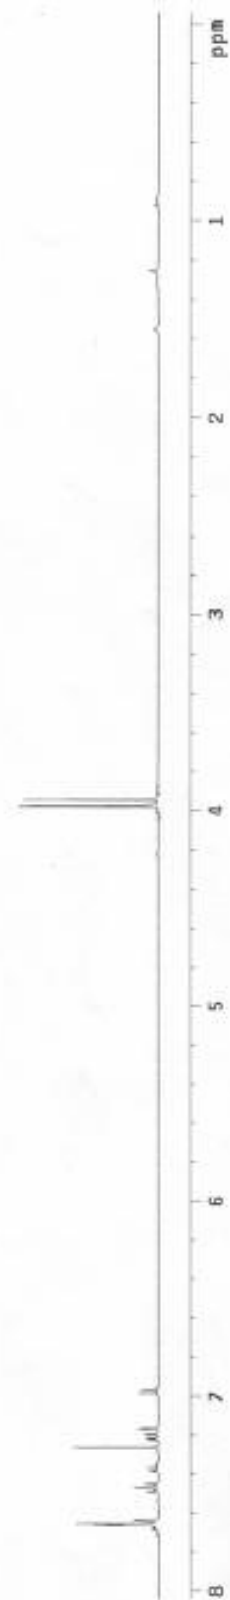

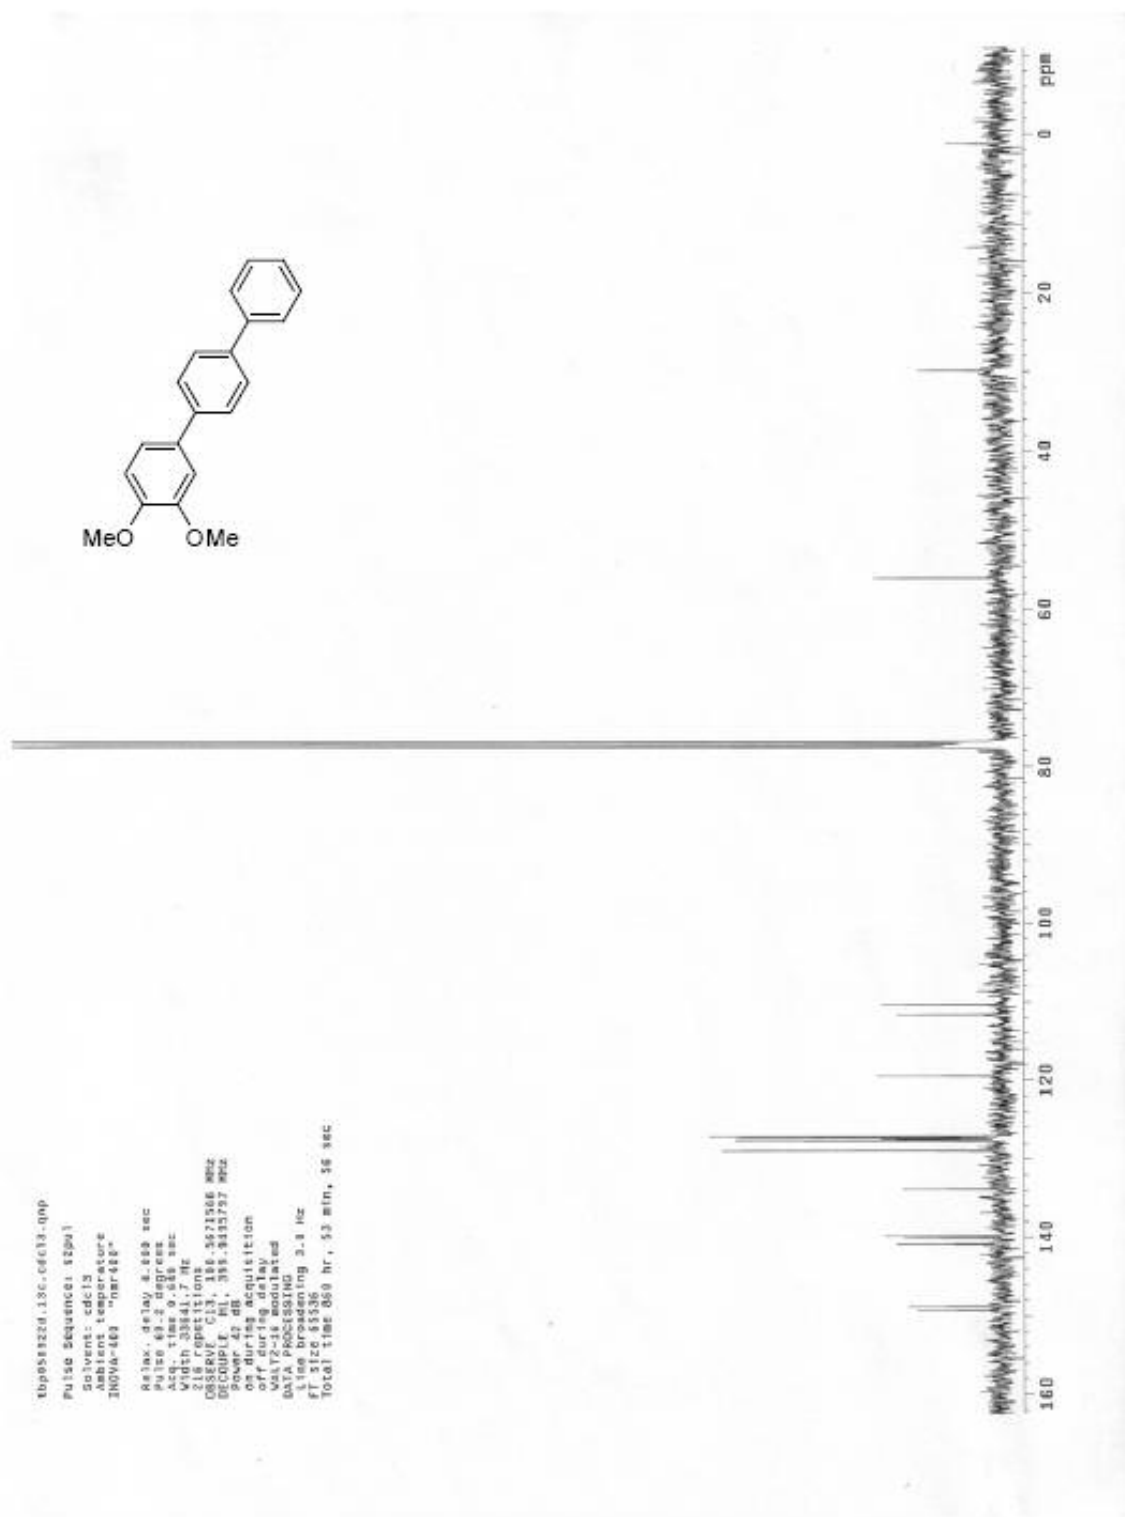



STANDARD 1H OBSERVE

Pulse Sequence: zgpg30  
Solvent: cdcl3  
Ambient temperature  
F1: C556  
INOVA-400 "hmr32g"

Relax. delay 1.800 sec  
Acq. time 3.744 sec  
Acq. time 3.744 sec  
width 386.5 Hz  
Single scan  
OBSERVE H1, 399.540861 MHz  
DATA PROCESSING 0.1 Hz  
FT 1280000  
Total time 0 min, 4 sec

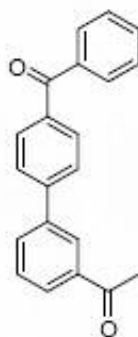

6

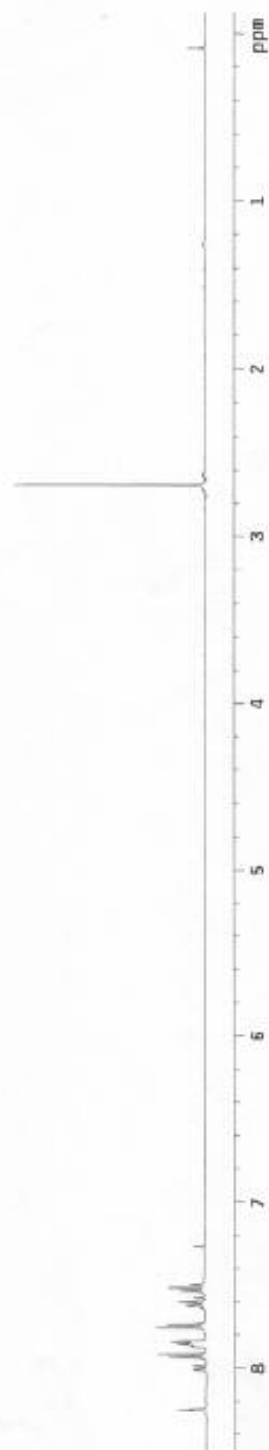

t2p01022d.13c.cd13.exp  
 Pulse Sequence: zgpg30  
 Solvent: cdcl3  
 Acquisition Temperature: 125.000000  
 INOVA-100 1H/13C-400+  
 Relax, delay 4.000 sec  
 Pulse 52.2 degrees  
 Acq. time 8.549 sec  
 Relax, delay 1.000 sec  
 30 repetitions  
 OBSERVE C13, 100.6251565 MHz  
 DECOUPLE H1, 200.1405797 MHz  
 Power 42.000  
 Acquisition  
 off during delay  
 VAL12-16 Modulated  
 DATA PROCESSING  
 F1 time processing 3.8 Hz  
 F1 time 1.000000  
 Total time 850 hr, 53 min, 56 sec

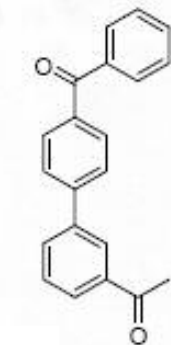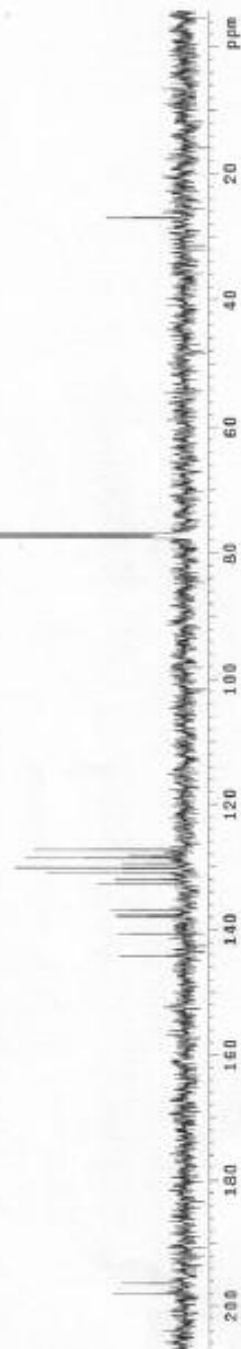

STANDARD IN OBSERVE

Pulse Sequence: zgpg30  
 Solvent: cdcl3  
 Acquisition temperature  
 100MHz-400 MHz/400 MHz

Relax. delay 1.000 sec  
 Pulse 67.5 degrees  
 Acq. time 3.18 sec  
 Width 5023.4 Hz  
 SFO 100.626 MHz

OBSERVE F1: 393.9166712 MHz  
 DATA PROCESSING  
 F1 time processing 0.1 Hz  
 F2 time processing 0.1 Hz  
 Total time 4 min, 4 sec

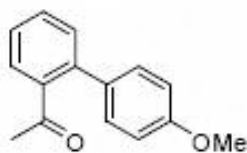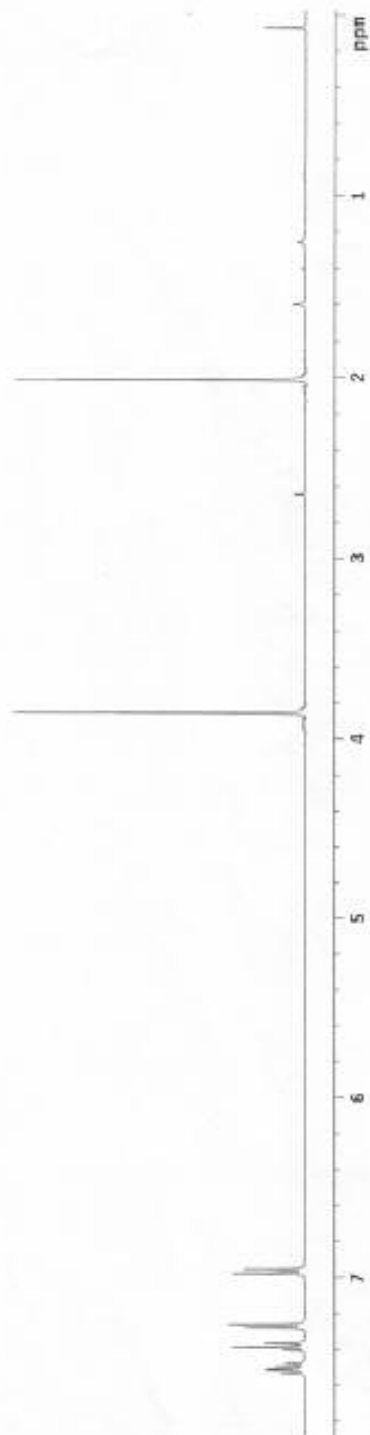

tb0559226.13r.cdcl3.qmg

Pulse Sequence: zgpg30

Solvent: cdcl3

Acquisition Temperature

400 MHz

Relax. delay 4.000 sec

Pulse 69.2 deg/sec

Acq. time 2.400 sec

Width 33641.7 Hz

SI: FID

Observed 13C, 100.621556 MHz

Decouple 1H, 399.945757 MHz

Power 42 dB

on during acquisition

off during delay

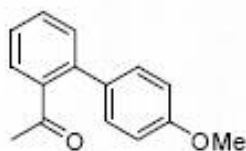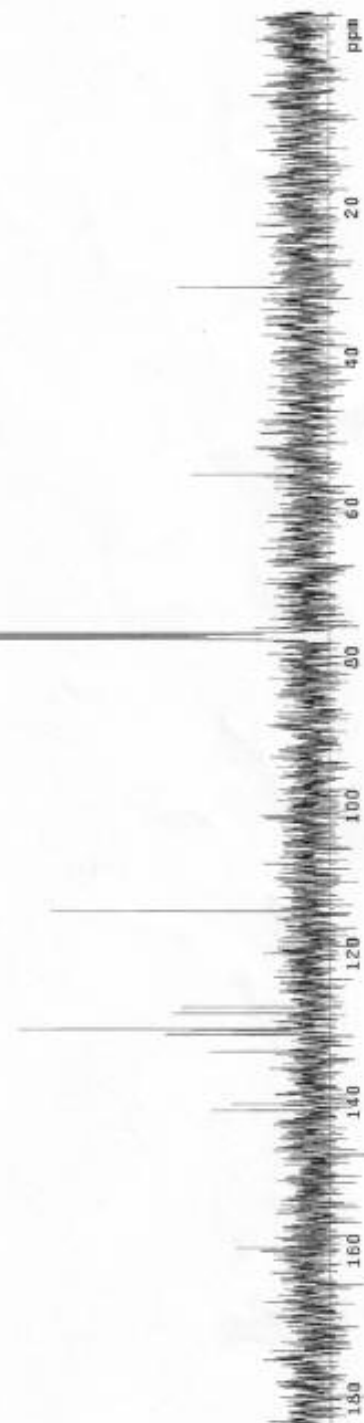

STANDARD IN OBSERVE

Pulse Sequence: zgpg30  
Solvent: cdcl3  
Acquisition temperature: 25.00  
INSTRUMENT: spect

Relax. delay: 1.000 sec  
Pulse: zgpg30  
Acq. time: 5.74 sec  
Sweep rate: 1 Hz  
Sweep range: 200 Hz  
Sweep center: 300.135 MHz  
OBSERVE: 1H, 300.135 MHz  
DATA PROCESSING  
Line broadening: 0.1 Hz  
FT size: 65536  
Total time: 6 min, 4 sec

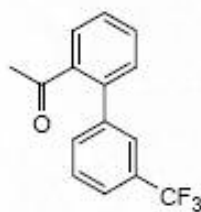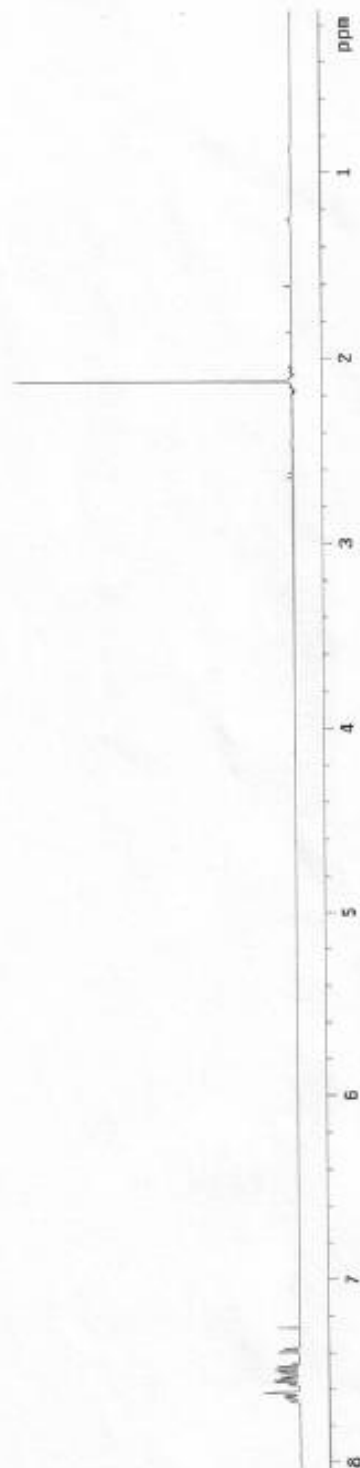

43p030220.13c.cdc18.npp

Pulse Sequence: zgpg30

Solvent: cdc18

Acquisition Temperature

INSTRUMENT: spect

Relax. delay 4.000 sec

Pulse 88.2 degrees

Acq. time 1.00 sec

Width 32641.7 Hz

64 repetitions

OBSERVE C13, 101.567156 MHz

DECOUPLE H1, 399.943577 MHz

Power 32 dB

Channel 1 acquisition

OTF 0.000000

VAL2-16 modified

DATA PROCESSING

Line broadening 3.0 Hz

FT 216350

Time 3.00 min, 50 sec

Total time 3.00 hr, 50 min, 50 sec

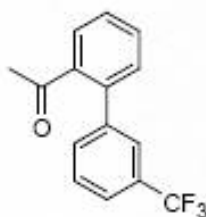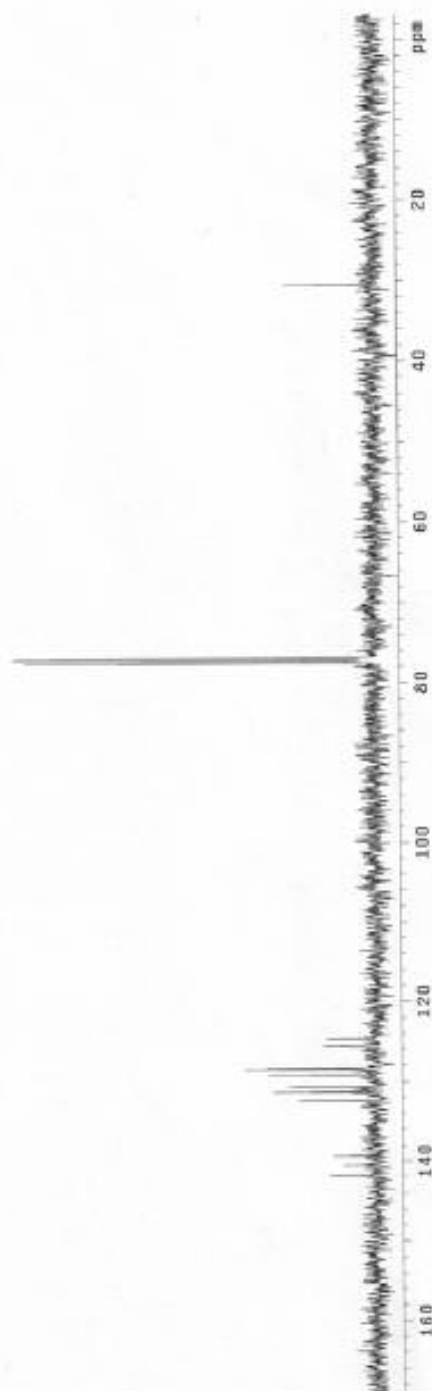

tb05692d.13c.cd13-4sp

Pulse Sequence: zgpg30

Solvent: cdcl3

Acquire temperature

File: 4375

PROBHD-133 1mm-130

Relax. delay: 4.000 sec

Pulse sequence: zgpg30

Acq: 130.643 sec

Width: 33601.7 Hz

58 repetitions

OBSERVE C13, 100.627166 MHz

DECOUPLE H1, 333.945197 MHz

Power: 2.000000 W

Off-resonance decoupling

off during delay

WALTZ-16 modulated

DATA PROCESSING

Line broadening 3.0 Hz

FT size 65536

Total time 56 hr, 53 min, 58 sec

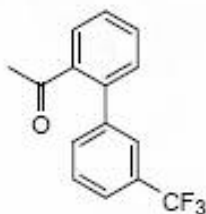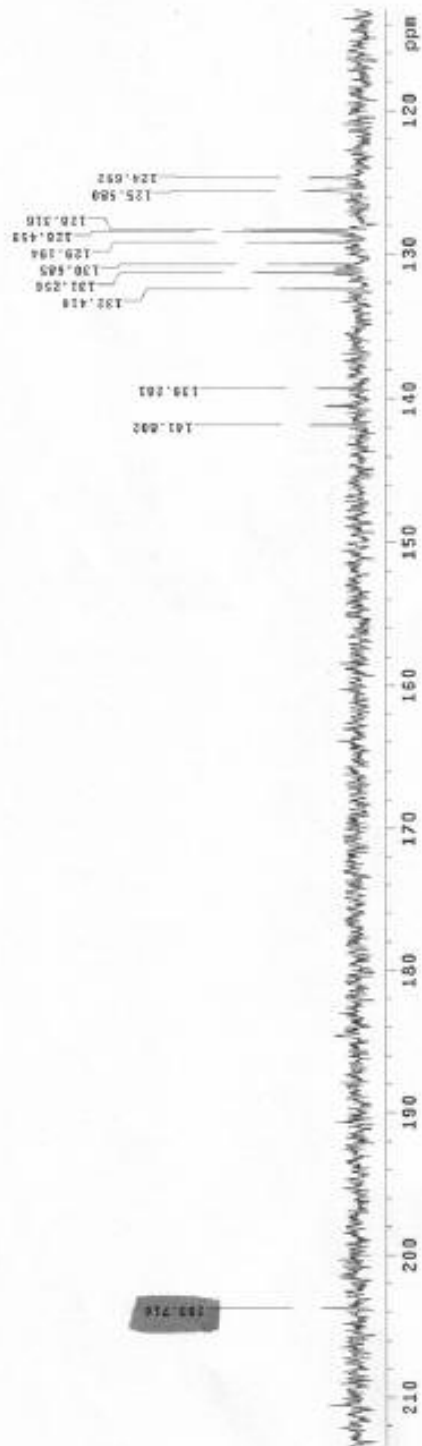

10

CCCCC/C=C/c1ccc(cc1)-c2ccccc2

```

Pulse Sequence: s2p01
Solvent: cdcl3
Ambient temperature
INOVA-400 "hmr430"
1H
Relax. delay 1.000 sec
p1 67.5 degrees
p2 67.5 degrees
Acq. time 3.744 sec
Width 5031.4 Hz
Single scan
RESERVE H1, 339.94565
DATA PROCESSING
Line broadening 0.1 Hz
FI size 85536
Total time 0 min, 4 sec

```

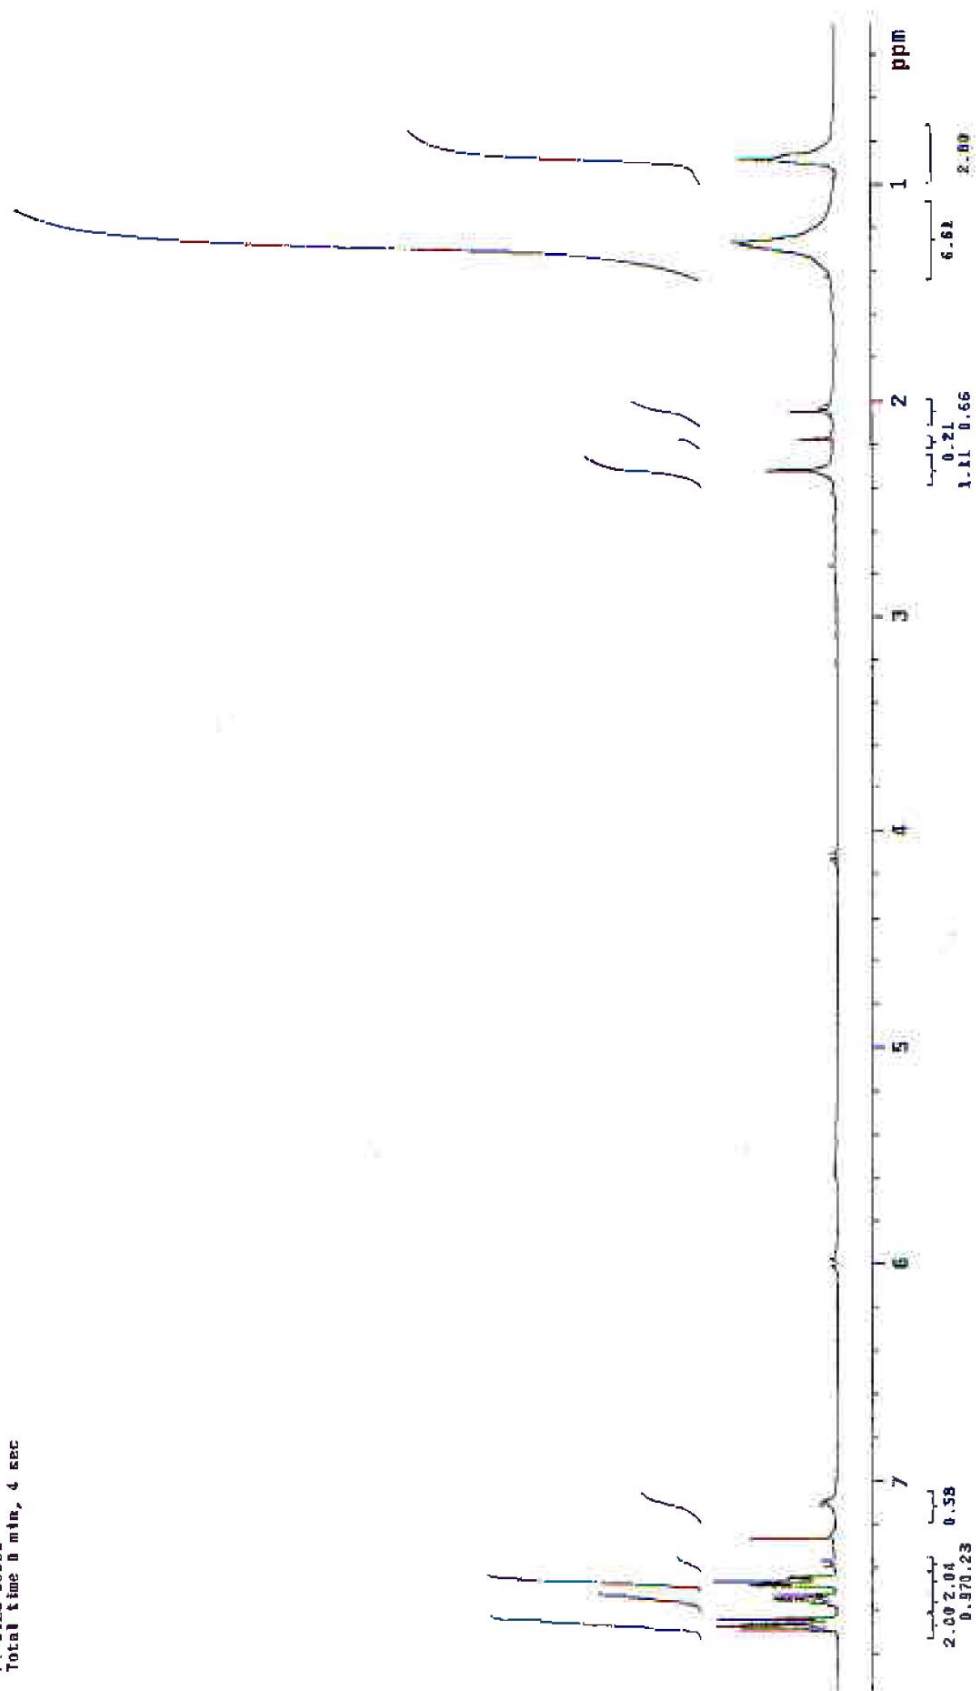



10

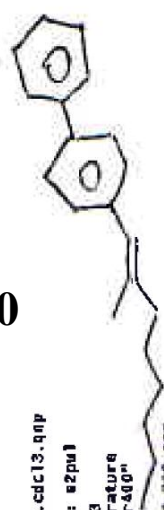

tkp0509224.13c.cdcl3.qnp

pulse sequence: zgpg30

Solvent: cdcl3

Acquisition temperature

INDRA-400 1H/400

Relax: delay 3.000 sec

Pulse program: zgpg30

Acq. time 3.500 sec

Width 33621.7 Hz

224 repetitions

OBSERVE C13, 100.625000 MHz

DECOUPLE H1, 399.345797 MHz

Power 42 dB

on during acquisition

off during delay

WALTZ-16 modulated

DATA PROCESSING

Line broadening 3.0 Hz

FT size 5536

TOTAL P.01

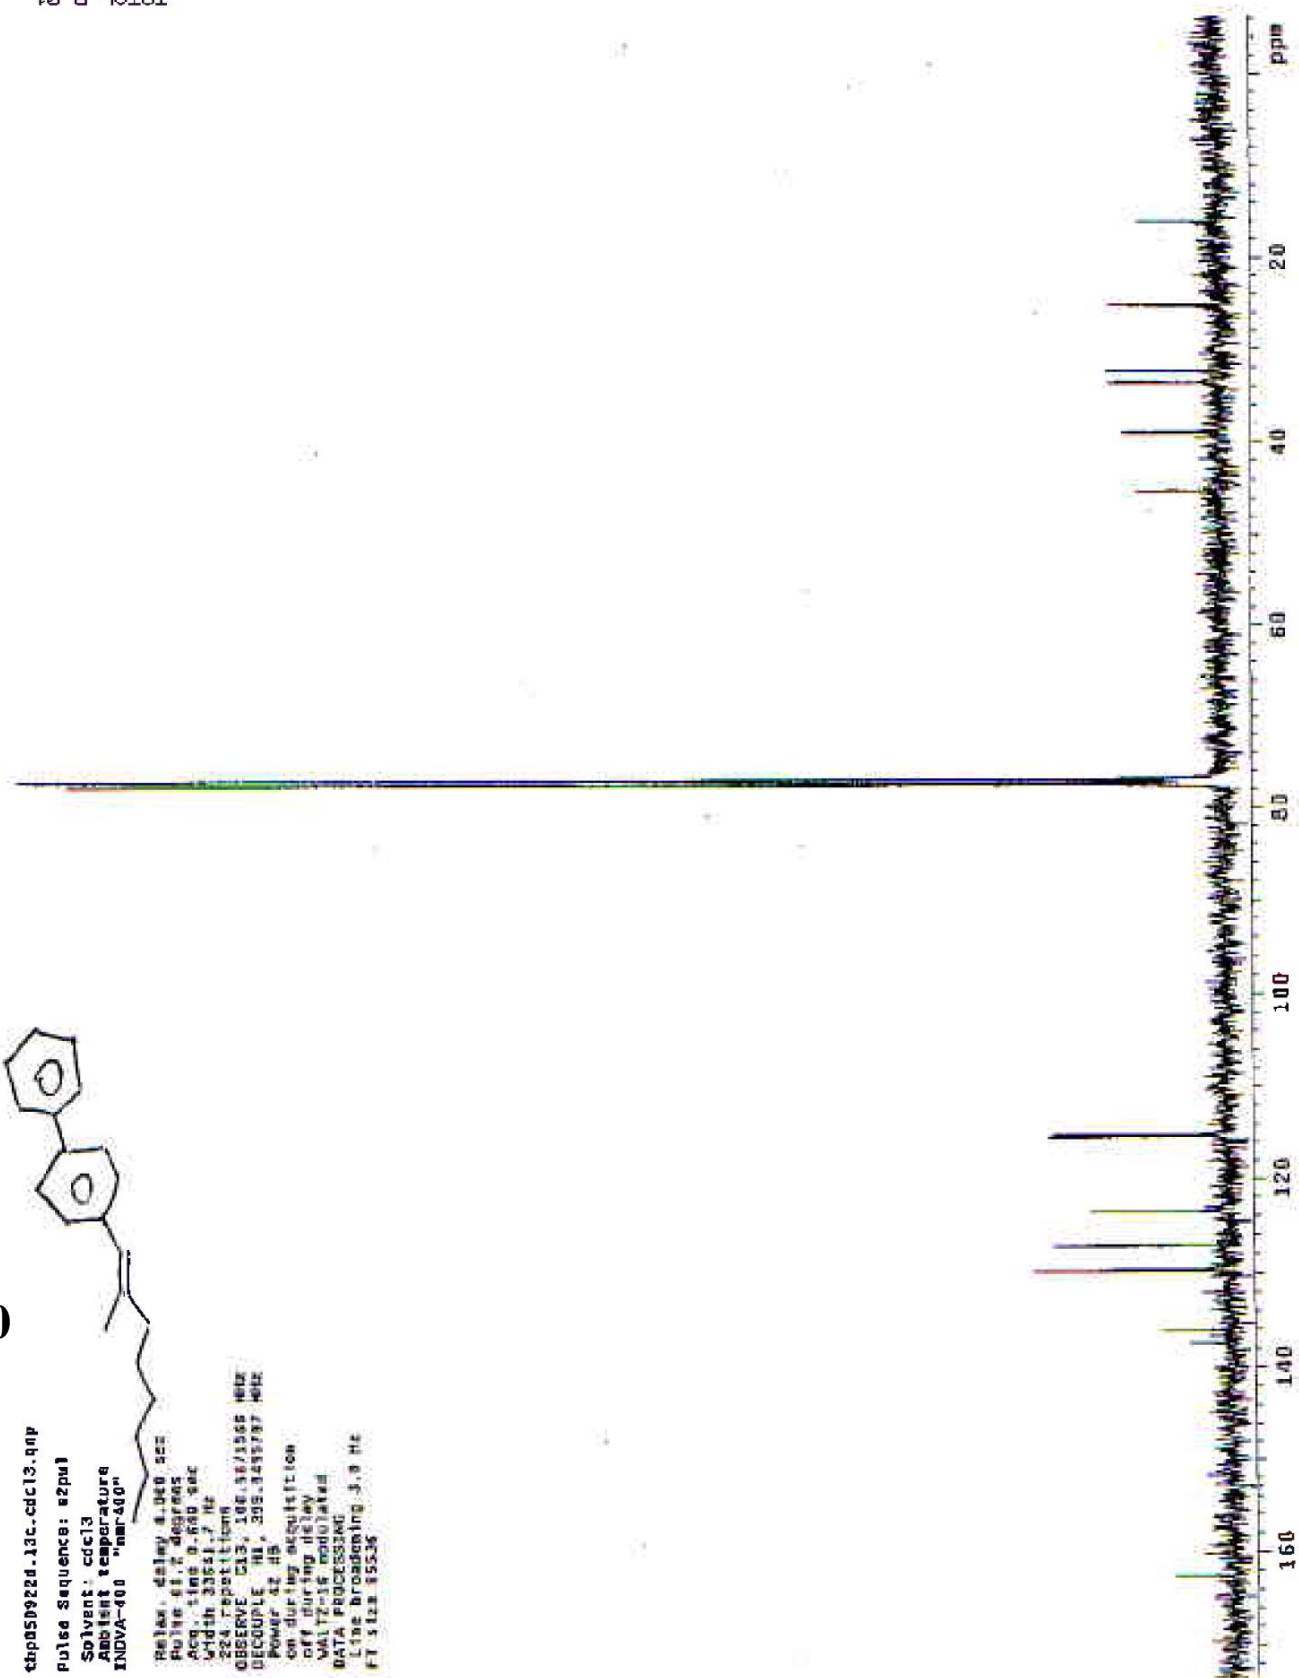

STANDARD 1H OBSERVE

Pulse Sequence: s2pul

Solvent: cdcl3

Ambient temperature

INOVA-400 <sup>1</sup>Hmr400-

Relax. delay 1.000 sec

Pulse 67.5 degrees

Acq. time 3.744 sec

Width 5031.4 Hz

Single scan

OBSERVE H1, 399.5486712 MHz

DATA PROCESSING

Line broadening 0.1 Hz

FT size 65536

Total time 0 min, 4 sec

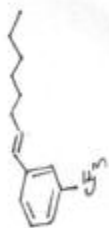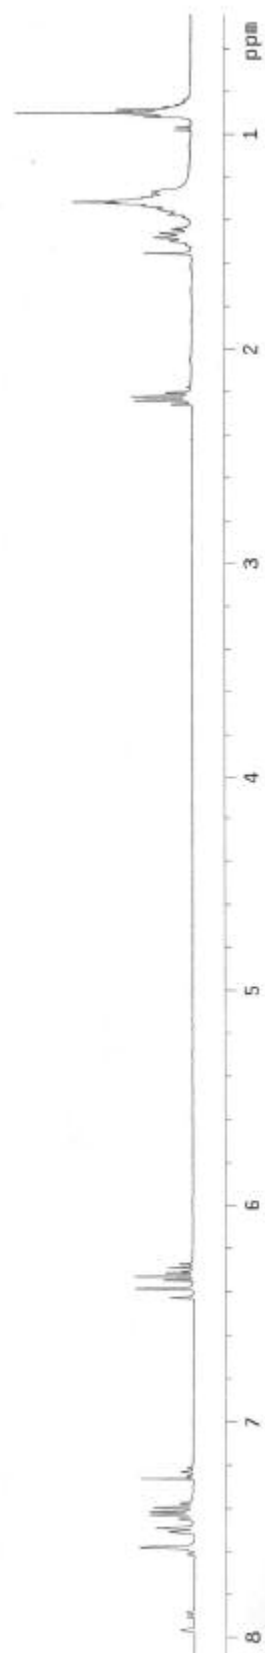

tbp050922d-13c.cdc13.qnp

Pulse Sequence: zgpg30

Solvent: cdcl3

Ambient temperature

INDVA-400 "nmr400"

Relax. delay 4.000 sec

Pulse 65.2 degrees

Acq. time 9.458 sec

Acq. date 17-07-2005

256 repetitions

OBSERVE C13, 100.621588 MHz

DECOUPLE H1, 399.945797 MHz

Power 42 dB

on during acquisition

off during delay

WALTZ-16 modulated

DATA PROCESSING

Line broadening 3.0 Hz

FT size 65536

Total time 860 hr, 53 min, 56 sec

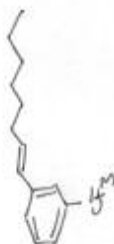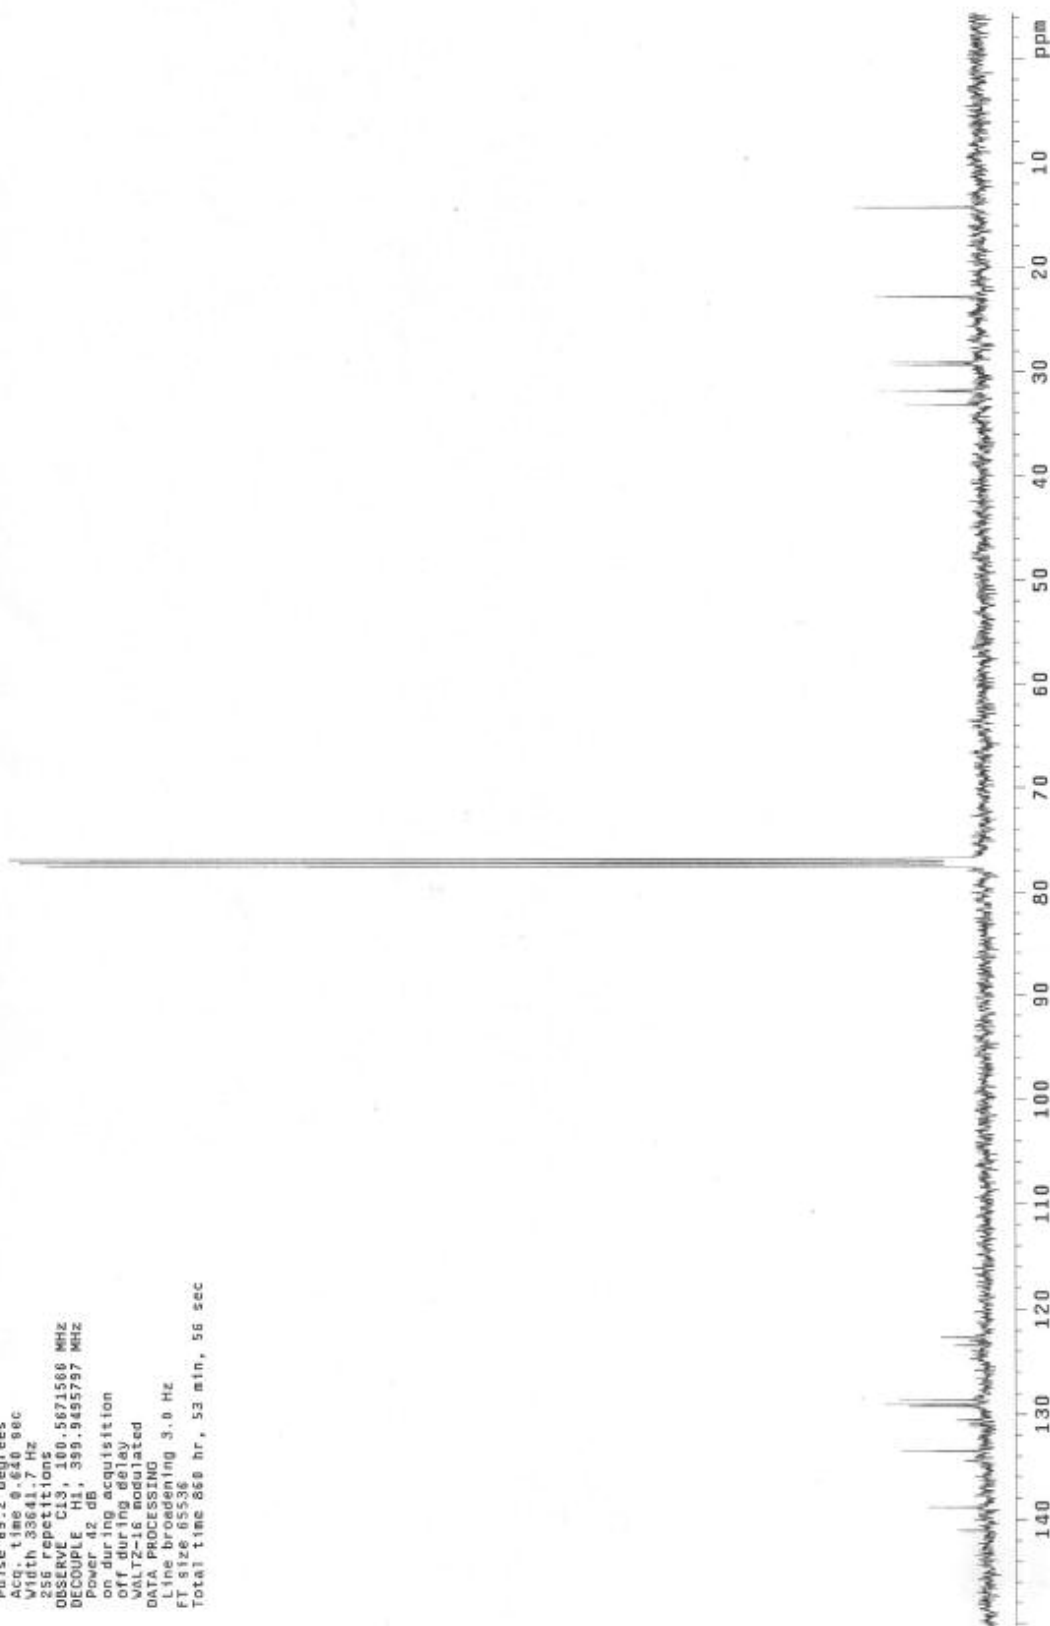

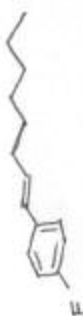

STANDARD 1H OBSERVE

Pulse Sequence: zgpg30

Solvent: cdcl3

Ambient temperature

INDVA=400 "nmr400"

Relax. delay 1.000 sec

Pulse 67.5 degrees

Acq. time 3.744 sec

Width 5931.4 Hz

Single scan

OBSERVE M1, 399.9486712 MHz

DATA PROCESSING

Line broadening 0.1 Hz

FT size 65536

Total time 0 min, 4 sec

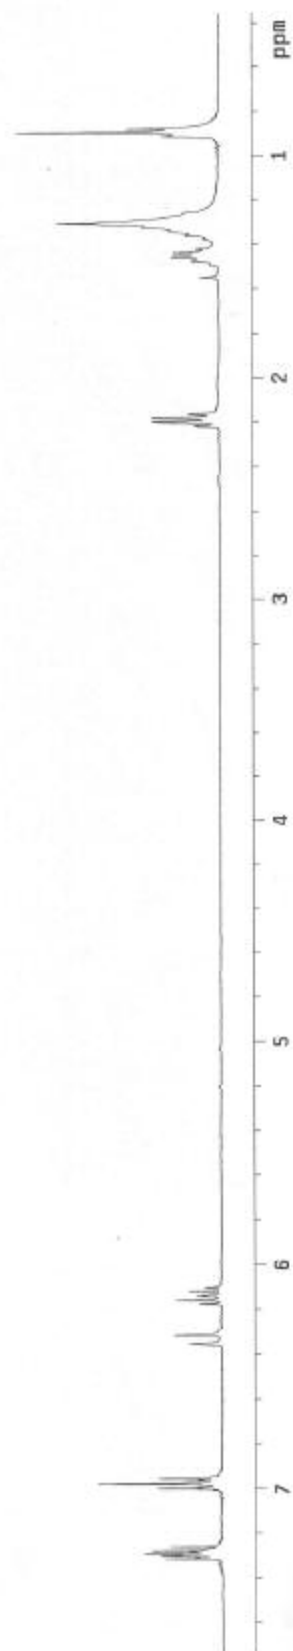

tbp050822d.13c.cdcl3.qnp

Pulse Sequence: s2pul

Solvent: cdcl3

Ambient temperature

INOVA-400 "nmr400"

Relax. delay 4.000 sec

Pulse 65.2 degrees

Acq. time 0.549 sec

Waltz 32041.7 Hz

72 repetitions

OBSERVE CH1, 100.627156 MHz

DECOUPLE CH1, 399.3495797 MHz

Power 42 dB

on during acquisition

off during delay

WALTZ-16 modulated

DATA PROCESSING

Line broadening 3.0 Hz

FT size 65536

Total time 860 hr, 53 min, 56 sec

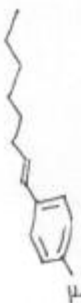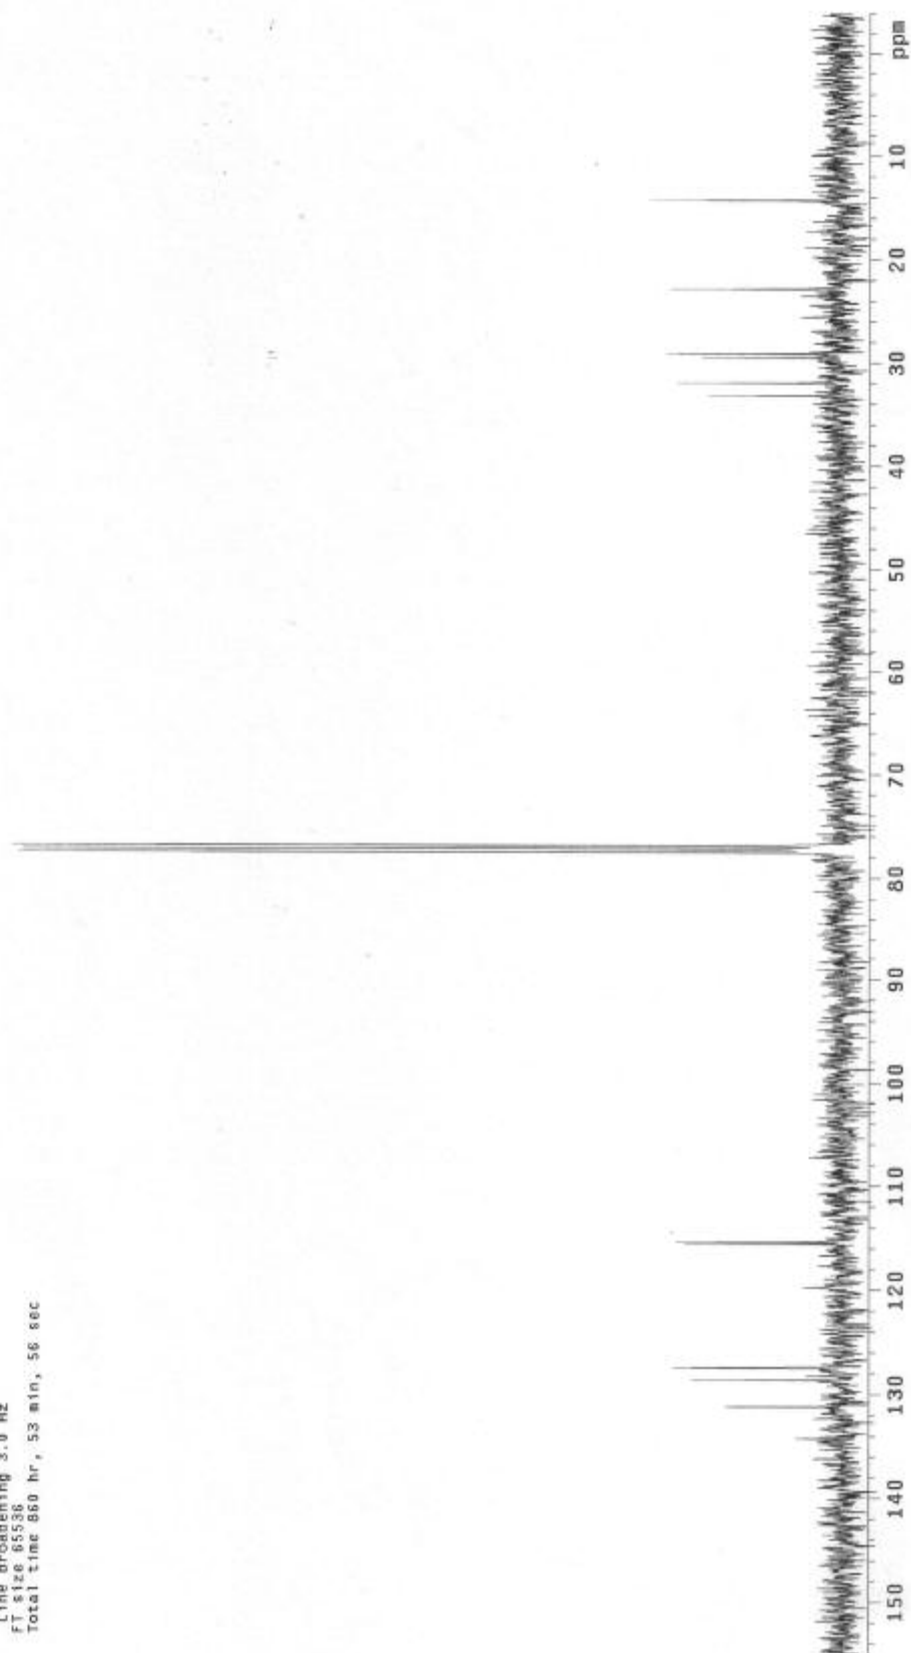

Supplement: Supplementary file 1 [file 4652179]
